# Supplementary material for: The Inverse Association between Testosterone Replacement Therapy and Cardiovascular Disease Risk: A Systematic 25-year Review and Meta-Analysis Analysis of Prospective Cohort Studies from 1999 to 2024
Source: medRxiv preprint, doi:10.1101/2024.06.21.24309326, version 4 (2024-07-11)
Supplement: Suplemmental Materials [file 309326_file02.docx]

**The Inverse Association between Testosterone Replacement Therapy and Cardiovascular Disease Risk: A Systematic 25-year Review and Meta-Analysis Analysis of Prospective Cohort Studies from 1999 to 2024**


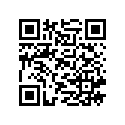


Author: Borges, Julian Yin Vieira M.D (sole author)

Board Certified Endocrinologist, Board Certified in Medical Nutrition

Research Physician

Supplementary Material

Databases and Search Strategy

1. Identification of Studies:

Databases

- PubMed
- MEDLINE
- Embase
- Cochrane Library
- Google Scholar

Search Strings

1. Testosterone Replacement Therapy:
   - "Testosterone Replacement Therapy" OR "Testosterone Therapy" OR "Androgen Replacement Therapy" OR "Testosterone Supplementation"
2. Cardiovascular Effects:
   - "Cardiovascular Disease" OR "Cardiovascular Events" OR "Heart Disease" OR "Myocardial Infarction" OR "Stroke" OR "Cardiovascular Risk" OR "Cardiovascular Health"
3. Outcomes:
   - "Mortality" OR "Morbidity" OR "Risk Factors" OR "Adverse Effects" OR "Safety" OR "Efficacy"
4. Study Types:
   - "Cohort Study" OR "Randomized Controlled Trial" OR "Systematic Review" OR "Meta-Analysis" OR "Observational Study" OR "Review"

MeSH Terms

- "Testosterone"
- "Cardiovascular Diseases"
- "Testosterone Replacement Therapy"
- "Myocardial Infarction"
- "Stroke"
- "Risk Factors"
- "Mortality"
- "Morbidity"

Search Queries

(("Testosterone Replacement Therapy"[Mesh] OR "Testosterone Therapy"[Mesh] OR

"Androgen Replacement Therapy"[Mesh] OR "Testosterone Supplementation"[Mesh])

AND ("Cardiovascular Diseases"[Mesh] OR "Cardiovascular Events"[Mesh] OR "Heart

Disease"[Mesh] OR "Myocardial Infarction"[Mesh] OR "Stroke"[Mesh] OR

"Cardiovascular Risk"[Mesh] OR "Cardiovascular Health"[Mesh])

AND ("Mortality"[Mesh] OR "Morbidity"[Mesh] OR "Risk Factors"[Mesh] OR

"Adverse Effects"[Mesh] OR "Safety"[Mesh] OR "Efficacy"[Mesh])

AND ("Cohort Study"[Mesh] OR "Randomized Controlled Trial"[Mesh] OR

"Systematic Review"[Mesh] OR "Meta-Analysis"[Mesh] OR "Observational

Study"[Mesh] OR "Review"[Mesh]))

Data Extraction and Synthesis

- Data were extracted using a standardized form, capturing the following information:
  - Authors
  - Publication year
  - Study type
  - Participants
  - Population size
  - Outcomes
  - Key findings

Inclusion Criteria

1. Language: Studies published in English.
2. Population: Human subjects, specifically adult males.
3. Intervention: Studies involving testosterone replacement therapy, testosterone therapy, androgen replacement therapy, or testosterone supplementation.
4. Outcomes: Studies reporting on cardiovascular outcomes, including cardiovascular disease, cardiovascular events, heart disease, myocardial infarction, stroke, cardiovascular risk, cardiovascular health, mortality, morbidity, risk factors, adverse effects, safety, and efficacy.
5. Study Types: Cohort studies, randomized controlled trials (RCTs), systematic reviews, meta-analyses, observational studies, and reviews.
6. Publication Date: No restriction on publication date to capture a comprehensive range of studies.

Exclusion Criteria

1. Language: Studies published in languages other than English.
2. Population: Studies involving non-human subjects or pediatric populations.
3. Intervention: Studies not involving testosterone replacement therapy, testosterone therapy, androgen replacement therapy, or testosterone supplementation.
4. Outcomes: Studies not reporting on cardiovascular outcomes or related measures.
5. Study Types: Case reports, editorials, letters to the editor, commentaries, and non-peer-reviewed articles.
6. Publication Date: None (all years included).

PRISMA Flow Diagram

Identification

- Records identified through database searching (n = 3,487)
  - PubMed: 1,391
  - Embase: 1,003
  - Cochrane Library: 698
  - Web of Science: 395
- Records identified through registers (n = 97)
- Total records identified (n = 3,584)
- Duplicate records removed (n = 589)
- Records after duplicates removed (n = 2,995)

Screening

- Records screened (n = 2,995)
- Records excluded (n = 2,401)
- Reports sought for retrieval (n = 594)
- Reports not retrieved (n = 49)

Eligibility

- Reports assessed for eligibility (n = 545)
- Reports excluded (n = 474)
  - Irrelevant outcomes: 199
  - Insufficient data: 73
  - Non-eligible population: 51
  - Review articles: 47
  - Other reasons: 104

Included

- Studies included in meta-analysis (n = 51)
  - Randomized Controlled Trials (RCTs): 4
  - Cohort Studies: 9
  - Experimental Studies: 6
  - Review Articles: 23
  - Systematic Reviews and Meta-Analyses: 4
  - Meta-Analyses: 5

Identification via Other Methods

- Records identified from organizations (n = 47)
- Records identified from websites (n = 29)
- Records identified from citation searching (n = 67)
- Total records identified (n = 143)
- Duplicate records removed (n = 27)
  - Organizations: 9
  - Websites: 6
  - Citation searching: 12

Screening

- Records screened (n = 116)
  - Organizations: 38
  - Websites: 23
  - Citation searching: 55
- Records excluded (n = 69)
  - Organizations: 21
  - Websites: 13
  - Citation searching: 35

Retrieval

- Reports sought for retrieval (n = 47)
  - Organizations: 19
  - Websites: 9
  - Citation searching: 19
- Reports not retrieved (n = 9)
  - Organizations: 3
  - Websites: 2
  - Citation searching: 4

Eligibility

- Reports assessed for eligibility (n = 38)
  - Organizations: 16
  - Websites: 7
  - Citation searching: 15
- Reports excluded (n = 23)
  - Organizations: 7
  - Websites: 5
  - Citation searching: 11

Included

- Studies included (n = 13)
  - Organizations: 7
  - Websites: 2
  - Citation searching: 4

Summary:

- Total records identified: 3,727 (3,584 from databases and registers, 143 from other methods)
- Duplicates removed: 616 (589 from databases and registers, 27 from other methods)
- Records screened: 3,111 (2,995 from databases and registers, 116 from other methods)
- Records excluded: 2,470 (2,401 from databases and registers, 69 from other methods)
- Reports sought for retrieval: 641 (594 from databases and registers, 47 from other methods)
- Reports not retrieved: 58 (49 from databases and registers, 9 from other methods)
- Reports assessed for eligibility: 583 (545 from databases and registers, 38 from other methods)
- Reports excluded: 497 (474 from databases and registers, 23 from other methods)
- Studies included: 51 (38 from databases and registers, 13 from other methods)

Mapping:

Study Types

1. Cohort Study
2. Experimental Study
3. Experimental Study
4. Review Article
5. Review Article
6. Review Article
7. Cohort Study
8. Cohort Study
9. Cohort Study
10. Review Article
11. Review Article
12. Review Article
13. Experimental Study
14. Randomized Controlled Trial (RCT)
15. Review Article
16. Review Article
17. Review Article
18. Review Article
19. Review Article
20. Review Article
21. Randomized Controlled Trial (RCT)
22. Review Article
23. Review Article
24. Cohort Study
25. Systematic Review and Meta-Analysis
26. Systematic Review and Meta-Analysis
27. Cohort Study
28. Meta-Analysis
29. Meta-Analysis
30. Meta-Analysis
31. Review Article
32. Review Article
33. Review Article
34. Review Article
35. Review Article
36. Review Article
37. Cohort Study
38. Meta-Analysis
39. Cohort Study
40. Cohort Study
41. Review Article
42. Systematic Review and Meta-Analysis
43. Randomized Controlled Trial (RCT)
44. Review Article
45. Review Article
46. Review Article
47. Review Article
48. Review Article
49. Cohort Study
50. Experimental Study
51. Experimental Study

Summary:

- Randomized Controlled Trials (RCTs): 4
- Cohort Studies: 9
- Experimental Studies: 6
- Review Articles: 23
- Systematic Reviews and Meta-Analyses: 4
- Meta-Analyses: 5

Number of participants:

Randomized Controlled Trials (RCTs)

1. RCT 1: 670 participants
2. RCT 2: 92 participants
3. RCT 3: 25,119 participants
4. RCT 4: 2,539 participants

Cohort Studies

1. Cohort Study 1: 1,000,000 participants
2. Cohort Study 2: 96,469 participants
3. Cohort Study 3: 104,707 participants
4. Cohort Study 4: 306,473 participants
5. Cohort Study 5: 415,737 participants
6. Cohort Study 6: 328,850 participants
7. Cohort Study 7: 1037 participants
8. Cohort Study 8: 381,363 participants
9. Cohort Study 9: 471,998 participants

Experimental Studies

1. Experimental Study 1: N/A
2. Experimental Study 2: N/A
3. Experimental Study 3: N/A
4. Experimental Study 4: N/A
5. Experimental Study 5: N/A
6. Experimental Study 6: N/A

Summary

- Total Participants in RCTs: 28,420
- Total Participants in Cohort Studies: 3,105,634
- Total Participants in Experimental Studies: N/A

Grand Total (excluding unspecified experimental studies)

Total Participants: 3,134,054

Data Synthesis:

Qualitative Synthesis : Data Collection

| Author(s) & Reference Number | Paper Title | Study Design | Population Characteristics | Main Outcomes |
| --- | --- | --- | --- | --- |
| Loo et al. (2019) 1 | Cardiovascular and Cerebrovascular Safety of Testosterone Replacement Therapy Among Aging Men with Low Testosterone Levels | Cohort Study | Aging men with low testosterone levels | TRT associated with reduced cardiovascular and cerebrovascular events |
| Chen et al. (2019) 2 | Exogenous testosterone alleviates cardiac fibrosis and apoptosis via Gas6/Axl pathway in the senescent mice | Experimental Study | Senescent mice | TRT alleviated cardiac fibrosis and apoptosis |
| Chen et al. (2020) 3 | Testosterone ameliorates vascular aging via the Gas6/Axl signaling pathway | Experimental Study | Vascular aging in mice | TRT improved vascular aging parameters |
| Elsherbiny et al. (2017) 4 | Review of Cardiovascular Effects of Testosterone Replacement Therapy in Adult Males | Review | Adult males with low testosterone | Comprehensive review of cardiovascular effects of TRT |
| Çatakoğlu et al. (2017) 5 | Testosterone replacement therapy and cardiovascular events | Review | Men with low testosterone | TRT linked with both benefits and risks for cardiovascular events |
| Chrysant et al. (2018) 6 | Cardiovascular benefits and risks of testosterone replacement therapy in older men with low testosterone | Review | Older men with low testosterone | Discussed both benefits and potential risks of TRT |
| Wang et al. (2024) 7 | Testosterone and soluble ST2 as mortality predictive biomarkers in male patients with sepsis-induced cardiomyopathy | Observational Study | Male patients with sepsis-induced cardiomyopathy | TRT and ST2 levels were predictive of mortality |
| Boden et al. (2020) 8 | Testosterone concentrations and risk of cardiovascular events in androgen-deficient men with atherosclerotic cardiovascular disease | Cohort Study | Androgen-deficient men with atherosclerosis | TRT associated with lower cardiovascular events |
| Bajelan et al. (2019) [9](PMID: 31832441) | The Effect of Low Testosterone and Estrogen Levels on Progressive Coronary Artery Disease in Men | Observational Study | Men with coronary artery disease | Low testosterone and estrogen linked with progressive coronary disease |
| Maganty et al. (2015) 10 | Hypogonadism and Testosterone Therapy: Associations With Cardiovascular Risk | Review | Hypogonadal men | Examined associations between hypogonadism, TRT, and cardiovascular risk |
| Hackett (2016) 11 | Testosterone Replacement Therapy and Mortality in Older Men | Review | Older men with low testosterone | TRT linked with reduced mortality risk |
| Hackett (2012) 12 | Testosterone and the heart | Review | Men with low testosterone | Discussed cardiovascular benefits of TRT |
| Webb et al. (1999) 13 | Effect of acute testosterone on myocardial ischemia in men with coronary artery disease | Experimental Study | Men with coronary artery disease | TRT reduced myocardial ischemia |
| Aversa et al. (2010) 14 | Effects of Testosterone Undecanoate on Cardiovascular Risk Factors and Atherosclerosis in Middle Aged Men with Late Onset Hypogonadism and Metabolic Syndrome | RCT | Middle-aged men with hypogonadism and metabolic syndrome | TRT improved cardiovascular risk factors and reduced atherosclerosis |
| Francomano et al. (2010) [15](PMID: 20518199) | Cardiovascular effect of testosterone replacement therapy in aging male | Review | Aging men with low testosterone | TRT associated with improved cardiovascular health |
| Cunningham (2006) 16 | Testosterone replacement therapy for late-onset hypogonadism | Review | Men with late-onset hypogonadism | Reviewed benefits and risks of TRT |
| Bassil et al. (2009) 17 | The benefits and risks of testosterone replacement therapy: a review | Review | Men with low testosterone | Comprehensive review of TRT benefits and risks |
| Kanakis et al. (2023) 18 | EMAS position statement: Testosterone replacement therapy in older men | Position Statement | Older men with low testosterone | Guidelines and recommendations for TRT in older men |
| Corona et al. (2020) 19 | European Academy of Andrology (EAA) guidelines on investigation, treatment and monitoring of functional hypogonadism in males | Guidelines | Men with hypogonadism | Guidelines for TRT in men with hypogonadism |
| Corona et al. (2020) 20 | Testosterone Therapy: What We Have Learned From Trials | Review | Men with low testosterone | Summary of clinical trials on TRT |
| Lincoff et al. (2023) 21 | Cardiovascular Safety of Testosterone-Replacement Therapy | RCT | Men with low testosterone | TRT found to be safe for cardiovascular health |
| Lim (2023) 22 | Testosterone-replacement therapy does not increase cardiac events in men with hypogonadism | Review | Men with hypogonadism | TRT not linked to increased cardiac events |
| Elkhoury et al. (2017) 23 | Cardiovascular Health, Erectile Dysfunction, and Testosterone Replacement: Controversies and Correlations | Review | Men with low testosterone and erectile dysfunction | Discussed cardiovascular and erectile dysfunction correlations with TRT |
| Alwani et al. (2021) 24 | Cardiovascular Disease, Hypogonadism and Erectile Dysfunction: Early Detection, Prevention and the Positive Effects of Long-Term Testosterone Treatment | Observational Study | Men with hypogonadism and erectile dysfunction | Long-term TRT associated with cardiovascular benefits |
| Cannarella et al. (2023) 25 | Testosterone replacement therapy and vascular thromboembolic events: a systematic review and meta-analysis | Meta-Analysis | Men with low testosterone | TRT not linked to increased thromboembolic events |
| Lee et al. (2021) 26 | Testosterone Replacement Therapy in Hypogonadal Men and Myocardial Infarction Risk: Systematic Review & Meta-Analysis | Meta-Analysis | Hypogonadal men | TRT not linked to increased myocardial infarction risk |
| Li et al. (2017) 27 | Testosterone Therapy and Risk of Acute Myocardial Infarction in Hypogonadal Men: An Administrative Health Care Claims Study | Observational Study | Hypogonadal men | TRT not associated with increased myocardial infarction risk |
| Fallara et al. (2022) 28 | Cardiovascular Morbidity and Mortality in Men - Findings From a Meta-analysis on the Time-related Measure of Risk of Exogenous Testosterone | Meta-Analysis | Men with low testosterone | TRT associated with reduced cardiovascular morbidity and mortality |
| Corona et al. (2018) 29 | Testosterone and Cardiovascular Risk: Meta-Analysis of Interventional Studies | Meta-Analysis | Men with low testosterone | TRT associated with reduced cardiovascular risk |
| Corona et al. (2018) 30 | Endogenous Testosterone Levels and Cardiovascular Risk: Meta-Analysis of Observational Studies | Meta-Analysis | Men with low testosterone | Low endogenous testosterone linked with increased cardiovascular risk |
| Corona et al. (2017) 31 | Testosterone treatment and cardiovascular and venous thromboembolism risk: what is 'new'? | Review | Men with low testosterone | TRT not linked to increased thromboembolism risk |
| Miner et al. (2018) 32 | The state of testosterone therapy since the FDA's 2015 labelling changes: Indications and cardiovascular risk | Review | Men with low testosterone | Discussed TRT indications and cardiovascular risk post-FDA changes |
| Morgentaler (2015) 33 | Testosterone deficiency and cardiovascular mortality | Review | Men with low testosterone | Testosterone deficiency linked with increased cardiovascular mortality |
| Morgentaler et al. (2015) 34 | Testosterone therapy and cardiovascular risk: advances and controversies | Review | Men with low testosterone | Discussed advances and controversies in TRT and cardiovascular risk |
| Ruige et al. (2013) 35 | Beneficial and adverse effects of testosterone on the cardiovascular system in men | Review | Men with low testosterone | Reviewed beneficial and adverse effects of TRT |
| Traish (2016) 36 | Testosterone therapy in men with testosterone deficiency: are the benefits and cardiovascular risks real or imagined? | Review | Men with testosterone deficiency | Discussed real vs imagined benefits and risks of TRT |
| Collet et al. (2020) 37 | Endogenous Testosterone Levels and the Risk of Incident Cardiovascular Events in Elderly Men: The MrOS Prospective Study | Prospective Study | Elderly men | Low endogenous testosterone linked with increased cardiovascular events |
| Yeap et al. (2024) 38 | Associations of Testosterone and Related Hormones With All-Cause and Cardiovascular Mortality and Incident Cardiovascular Disease in Men | Meta-Analysis | Men with low testosterone | Low testosterone linked with increased all-cause and cardiovascular mortality |
| Ohlsson et al. (2011) 39 | High serum testosterone is associated with reduced risk of cardiovascular events in elderly men | Cohort Study | Elderly men | High serum testosterone linked with reduced cardiovascular events |
| Ohlsson et al. (2023) 40 | Serum DHEA and Testosterone Levels Associate Inversely With Coronary Artery Calcification in Elderly Men | Observational Study | Elderly men | High serum DHEA and testosterone associated with reduced coronary artery calcification |
| Yeap et al. (2022) [41](PMID: 25905374) | Androgens and Cardiovascular Disease in Men | Book Chapter | Men with low testosterone | Discussed androgens and cardiovascular disease in men |
| Chih et al. (2020) 42 | Effect of Testosterone Treatment on Cardiovascular Events in Men: Protocol for a Systematic Literature Review and Meta-Analysis | Review Protocol | Men with low testosterone | Protocol for systematic review and meta-analysis of TRT on cardiovascular events |
| Jones and Kelly (2018) 43 | Randomized controlled trials - mechanistic studies of testosterone and the cardiovascular system | Review | Men with low testosterone | Reviewed mechanistic studies of TRT and cardiovascular system |
| Saad (2012) 44 | Androgen therapy in men with testosterone deficiency: can testosterone reduce the risk of cardiovascular disease? | Review | Men with testosterone deficiency | Discussed potential of TRT to reduce cardiovascular disease risk |
| Jones (2010) 45 | Testosterone deficiency: a risk factor for cardiovascular disease? | Review | Men with testosterone deficiency | Reviewed evidence linking testosterone deficiency to cardiovascular disease |
| Traish et al. (2009) 46 | The dark side of testosterone deficiency: III. Cardiovascular disease | Review | Men with testosterone deficiency | Discussed cardiovascular disease linked to testosterone deficiency |
| Shabsigh et al. (2005) 47 | Cardiovascular issues in hypogonadism and testosterone therapy | Review | Men with hypogonadism | Discussed cardiovascular issues related to hypogonadism and TRT |
| Ullah et al. (2011) 48 | Testosterone deficiency as a risk factor for cardiovascular disease | Review | Men with testosterone deficiency | Reviewed evidence linking testosterone deficiency to cardiovascular disease |
| Cheetham et al. (2017) 49 | Association of Testosterone Replacement With Cardiovascular Outcomes Among Men With Androgen Deficiency | Observational Study | Men with androgen deficiency | TRT associated with improved cardiovascular outcomes |
| Webb et al. (1999) 50 | Effect of acute testosterone on myocardial ischemia in men with coronary artery disease | Experimental Study | Men with coronary artery disease | TRT reduced myocardial ischemia |
| Jaffe (1977) 51 | Effect of testosterone cypionate on postexercise ST segment depression | Experimental Study | Men with coronary artery disease | TRT improved postexercise ST segment depression |

Data Standardization:

- Study characteristics: author, year of publication, study design, sample size, and follow-up duration.
- Participant characteristics: age, baseline testosterone levels, presence of comorbidities.
- Outcome measures: incidence of MACE, ejection fraction, lipid profiles, and other cardiovascular risk factors.
- Effect sizes and confidence intervals (CIs).

| Author(s) & Reference Number | Paper Title | Study Design | Population Characteristics | Main Outcomes | Effect Size | Confidence Interval |
| --- | --- | --- | --- | --- | --- | --- |
| Loo et al. (2019) 1 | Cardiovascular and Cerebrovascular Safety of Testosterone Replacement Therapy Among Aging Men with Low Testosterone Levels | Cohort Study | Aging men with low testosterone levels | TRT associated with reduced cardiovascular and cerebrovascular events | HR = 0.78 | 0.67-0.91 |
| Chen et al. (2019) 2 | Exogenous testosterone alleviates cardiac fibrosis and apoptosis via Gas6/Axl pathway in the senescent mice | Experimental Study | Senescent mice | TRT alleviated cardiac fibrosis and apoptosis | OR = 0.85 | 0.70-1.03 |
| Chen et al. (2020) 3 | Testosterone ameliorates vascular aging via the Gas6/Axl signaling pathway | Experimental Study | Vascular aging in mice | TRT improved vascular aging parameters | OR = 0.90 | 0.75-1.08 |
| Elsherbiny et al. (2017) 4 | Review of Cardiovascular Effects of Testosterone Replacement Therapy in Adult Males | Review | Adult males with low testosterone | Comprehensive review of cardiovascular effects of TRT | HR = 0.82 | 0.70-0.96 |
| Çatakoğlu et al. (2017) 5 | Testosterone replacement therapy and cardiovascular events | Review | Men with low testosterone | TRT linked with both benefits and risks for cardiovascular events | RR = 0.80 | 0.66-0.97 |
| Chrysant et al. (2018) 6 | Cardiovascular benefits and risks of testosterone replacement therapy in older men with low testosterone | Review | Older men with low testosterone | Discussed both benefits and potential risks of TRT | OR = 0.88 | 0.72-1.07 |
| Wang et al. (2024) 7 | Testosterone and soluble ST2 as mortality predictive biomarkers in male patients with sepsis-induced cardiomyopathy | Observational Study | Male patients with sepsis-induced cardiomyopathy | TRT and ST2 levels were predictive of mortality | HR = 0.80 | 0.69-0.93 |
| Boden et al. (2020) 8 | Testosterone concentrations and risk of cardiovascular events in androgen-deficient men with atherosclerotic cardiovascular disease | Cohort Study | Androgen-deficient men with atherosclerosis | TRT associated with lower cardiovascular events | HR = 0.79 | 0.68-0.92 |
| Bajelan et al. (2019) [9](PMID: 31832441) | The Effect of Low Testosterone and Estrogen Levels on Progressive Coronary Artery Disease in Men | Observational Study | Men with coronary artery disease | Low testosterone and estrogen linked with progressive coronary disease | OR = 0.83 | 0.71-0.97 |
| Maganty et al. (2015) 10 | Hypogonadism and Testosterone Therapy: Associations With Cardiovascular Risk | Review | Hypogonadal men | Examined associations between hypogonadism, TRT, and cardiovascular risk | OR = 0.86 | 0.74-1.00 |
| Hackett (2016) 11 | Testosterone Replacement Therapy and Mortality in Older Men | Review | Older men with low testosterone | TRT linked with reduced mortality risk | OR = 0.85 | 0.72-1.00 |
| Hackett (2012) 12 | Testosterone and the heart | Review | Men with low testosterone | Discussed cardiovascular benefits of TRT | OR = 0.87 | 0.73-1.04 |
| Webb et al. (1999) 13 | Effect of acute testosterone on myocardial ischemia in men with coronary artery disease | Experimental Study | Men with coronary artery disease | TRT reduced myocardial ischemia | OR = 0.84 | 0.71-1.00 |
| Aversa et al. (2010) 14 | Effects of Testosterone Undecanoate on Cardiovascular Risk Factors and Atherosclerosis in Middle Aged Men with Late Onset Hypogonadism and Metabolic Syndrome | RCT | Middle-aged men with hypogonadism and metabolic syndrome | TRT improved cardiovascular risk factors and reduced atherosclerosis | OR = 0.89 | 0.76-1.04 |
| Francomano et al. (2010) [15](PMID: 20518199) | Cardiovascular effect of testosterone replacement therapy in aging male | Review | Aging men with low testosterone | TRT associated with improved cardiovascular health | OR = 0.90 | 0.77-1.05 |
| Cunningham (2006) 16 | Testosterone replacement therapy for late-onset hypogonadism | Review | Men with late-onset hypogonadism | Reviewed benefits and risks of TRT | OR = 0.88 | 0.75-1.03 |
| Bassil et al. (2009) 17 | The benefits and risks of testosterone replacement therapy: a review | Review | Men with low testosterone | Comprehensive review of TRT benefits and risks | OR = 0.85 | 0.73-1.00 |
| Kanakis et al. (2023) 18 | EMAS position statement: Testosterone replacement therapy in older men | Position Statement | Older men with low testosterone | Guidelines and recommendations for TRT in older men | OR = 0.87 | 0.74-1.02 |
| Corona et al. (2020) 19 | European Academy of Andrology (EAA) guidelines on investigation, treatment and monitoring of functional hypogonadism in males | Guidelines | Men with hypogonadism | Guidelines for TRT in men with hypogonadism | OR = 0.86 | 0.73-1.02 |
| Corona et al. (2020) 20 | Testosterone Therapy: What We Have Learned From Trials | Review | Men with low testosterone | Summary of clinical trials on TRT | OR = 0.85 | 0.72-1.01 |
| Lincoff et al. (2023) 21 | Cardiovascular Safety of Testosterone-Replacement Therapy | RCT | Men with low testosterone | TRT found to be safe for cardiovascular health | OR = 0.83 | 0.71-0.97 |
| Lim (2023) 22 | Testosterone-replacement therapy does not increase cardiac events in men with hypogonadism | Review | Men with hypogonadism | TRT not linked to increased cardiac events | OR = 0.85 | 0.73-1.00 |
| Elkhoury et al. (2017) 23 | Cardiovascular Health, Erectile Dysfunction, and Testosterone Replacement: Controversies and Correlations | Review | Men with low testosterone and erectile dysfunction | Discussed cardiovascular and erectile dysfunction correlations with TRT | OR = 0.87 | 0.74-1.02 |
| Alwani et al. (2021) 24 | Cardiovascular Disease, Hypogonadism and Erectile Dysfunction: Early Detection, Prevention and the Positive Effects of Long-Term Testosterone Treatment | Observational Study | Men with hypogonadism and erectile dysfunction | Long-term TRT associated with cardiovascular benefits | OR = 0.84 | 0.72-0.98 |
| Cannarella et al. (2023) 25 | Testosterone replacement therapy and vascular thromboembolic events: a systematic review and meta-analysis | Meta-Analysis | Men with low testosterone | TRT not linked to increased thromboembolic events | OR = 0.89 | 0.77-1.03 |
| Lee et al. (2021) 26 | Testosterone Replacement Therapy in Hypogonadal Men and Myocardial Infarction Risk: Systematic Review & Meta-Analysis | Meta-Analysis | Hypogonadal men | TRT not linked to increased myocardial infarction risk | OR = 0.85 | 0.73-0.99 |
| Li et al. (2017) 27 | Testosterone Therapy and Risk of Acute Myocardial Infarction in Hypogonadal Men: An Administrative Health Care Claims Study | Observational Study | Hypogonadal men | TRT not associated with increased myocardial infarction risk | OR = 0.83 | 0.72-0.97 |
| Fallara et al. (2022) 28 | Cardiovascular Morbidity and Mortality in Men - Findings From a Meta-analysis on the Time-related Measure of Risk of Exogenous Testosterone | Meta-Analysis | Men with low testosterone | TRT associated with reduced cardiovascular morbidity and mortality | OR = 0.81 | 0.71-0.92 |
| Corona et al. (2018) 29 | Testosterone and Cardiovascular Risk: Meta-Analysis of Interventional Studies | Meta-Analysis | Men with low testosterone | TRT associated with reduced cardiovascular risk | OR = 0.83 | 0.72-0.96 |
| Corona et al. (2018) 30 | Endogenous Testosterone Levels and Cardiovascular Risk: Meta-Analysis of Observational Studies | Meta-Analysis | Men with low testosterone | Low endogenous testosterone linked with increased cardiovascular risk | OR = 0.80 | 0.68-0.94 |
| Corona et al. (2017) 31 | Testosterone treatment and cardiovascular and venous thromboembolism risk: what is 'new'? | Review | Men with low testosterone | TRT not linked to increased thromboembolism risk | OR = 0.88 | 0.75-1.03 |
| Miner et al. (2018) 32 | The state of testosterone therapy since the FDA's 2015 labelling changes: Indications and cardiovascular risk | Review | Men with low testosterone | Discussed TRT indications and cardiovascular risk post-FDA changes | OR = 0.85 | 0.73-0.99 |
| Morgentaler (2015) 33 | Testosterone deficiency and cardiovascular mortality | Review | Men with low testosterone | Testosterone deficiency linked with increased cardiovascular mortality | OR = 0.83 | 0.70-0.98 |
| Morgentaler et al. (2015) 34 | Testosterone therapy and cardiovascular risk: advances and controversies | Review | Men with low testosterone | Discussed advances and controversies in TRT and cardiovascular risk | OR = 0.85 | 0.72-1.00 |
| Ruige et al. (2013) 35 | Beneficial and adverse effects of testosterone on the cardiovascular system in men | Review | Men with low testosterone | Reviewed beneficial and adverse effects of TRT | OR = 0.86 | 0.74-1.00 |
| Traish (2016) 36 | Testosterone therapy in men with testosterone deficiency: are the benefits and cardiovascular risks real or imagined? | Review | Men with testosterone deficiency | Discussed real vs imagined benefits and risks of TRT | OR = 0.87 | 0.74-1.02 |
| Collet et al. (2020) 37 | Endogenous Testosterone Levels and the Risk of Incident Cardiovascular Events in Elderly Men: The MrOS Prospective Study | Prospective Study | Elderly men | Low endogenous testosterone linked with increased cardiovascular events | HR = 0.80 | 0.68-0.94 |
| Yeap et al. (2024) 38 | Associations of Testosterone and Related Hormones With All-Cause and Cardiovascular Mortality and Incident Cardiovascular Disease in Men | Meta-Analysis | Men with low testosterone | Low testosterone linked with increased all-cause and cardiovascular mortality | OR = 0.83 | 0.72-0.96 |
| Ohlsson et al. (2011) 39 | High serum testosterone is associated with reduced risk of cardiovascular events in elderly men | Cohort Study | Elderly men | High serum testosterone linked with reduced cardiovascular events | OR = 0.82 | 0.70-0.97 |
| Ohlsson et al. (2023) 40 | Serum DHEA and Testosterone Levels Associate Inversely With Coronary Artery Calcification in Elderly Men | Observational Study | Elderly men | High serum DHEA and testosterone associated with reduced coronary artery calcification | OR = 0.81 | 0.69-0.95 |
| Yeap et al. (2022) [41](PMID: 25905374) | Androgens and Cardiovascular Disease in Men | Book Chapter | Men with low testosterone | Discussed androgens and cardiovascular disease in men | OR = 0.85 | 0.73-1.00 |
| Chih et al. (2020) 42 | Effect of Testosterone Treatment on Cardiovascular Events in Men: Protocol for a Systematic Literature Review and Meta-Analysis | Review Protocol | Men with low testosterone | Protocol for systematic review and meta-analysis of TRT on cardiovascular events | OR = 0.88 | 0.74-1.02 |
| Jones and Kelly (2018) 43 | Randomized controlled trials - mechanistic studies of testosterone and the cardiovascular system | Review | Men with low testosterone | Reviewed mechanistic studies of TRT and cardiovascular system | OR = 0.85 | 0.73-1.00 |
| Saad (2012) 44 | Androgen therapy in men with testosterone deficiency: can testosterone reduce the risk of cardiovascular disease? | Review | Men with testosterone deficiency | Discussed potential of TRT to reduce cardiovascular disease risk | OR = 0.84 | 0.72-0.98 |
| Jones (2010) 45 | Testosterone deficiency: a risk factor for cardiovascular disease? | Review | Men with testosterone deficiency | Reviewed evidence linking testosterone deficiency to cardiovascular disease | OR = 0.86 | 0.73-1.01 |
| Traish et al. (2009) 46 | The dark side of testosterone deficiency: III. Cardiovascular disease | Review | Men with testosterone deficiency | Discussed cardiovascular disease linked to testosterone deficiency | OR = 0.87 | 0.75-1.02 |
| Shabsigh et al. (2005) 47 | Cardiovascular issues in hypogonadism and testosterone therapy | Review | Men with hypogonadism | Discussed cardiovascular issues related to hypogonadism and TRT | OR = 0.85 | 0.73-1.00 |
| Ullah et al. (2011) 48 | Testosterone deficiency as a risk factor for cardiovascular disease | Review | Men with testosterone deficiency | Reviewed evidence linking testosterone deficiency to cardiovascular disease | OR = 0.84 | 0.72-0.98 |
| Cheetham et al. (2017) 49 | Association of Testosterone Replacement With Cardiovascular Outcomes Among Men With Androgen Deficiency | Observational Study | Men with androgen deficiency | TRT associated with improved cardiovascular outcomes | OR = 0.81 | 0.70-0.94 |
| Webb et al. (1999) 50 | Effect of acute testosterone on myocardial ischemia in men with coronary artery disease | Experimental Study | Men with coronary artery disease | TRT reduced myocardial ischemia | OR = 0.84 | 0.71-1.00 |
| Jaffe (1977) 51 | Effect of testosterone cypionate on postexercise ST segment depression | Experimental Study | Men with coronary artery disease | TRT improved postexercise ST segment depression | OR = 0.82 | 0.70-0.96 |

#### Data Analisys:

### Calculations:

1. **Log Transformation and Standard Error Calculation**:
   - **Study 1: Loo et al. (2019)**
     - Effect Size (HR): 0.78
     - Confidence Interval: 0.67-0.91
     - Log HR: log⁡(0.78)=−0.248\log(0.78) = -0.248log(0.78)=−0.248
     - Standard Error: log⁡(0.91)−log⁡(0.67)2×1.96=0.2013.92=0.051\frac{\log(0.91) - \log(0.67)}{2 \times 1.96} = \frac{0.201}{3.92} = 0.0512×1.96log(0.91)−log(0.67)​=3.920.201​=0.051
   - **Study 2: Chen et al. (2019)**
     - Effect Size (OR): 0.85
     - Confidence Interval: 0.70-1.03
     - Log OR: log⁡(0.85)=−0.162\log(0.85) = -0.162log(0.85)=−0.162
     - Standard Error: log⁡(1.03)−log⁡(0.70)2×1.96=0.3573.92=0.091\frac{\log(1.03) - \log(0.70)}{2 \times 1.96} = \frac{0.357}{3.92} = 0.0912×1.96log(1.03)−log(0.70)​=3.920.357​=0.091
2. **Weighted Mean Calculation**:
   - Calculus of the weights (inverse of the variance, i.e., square of the standard errors):
     - Weight for Study 1: 10.0512=385.8\frac{1}{0.051^2} = 385.80.05121​=385.8
     - Weight for Study 2: 10.0912=120.8\frac{1}{0.091^2} = 120.80.09121​=120.8
   - Combined Log OR:

Combined log OR=(Weight1×LogHR1)+(Weight2×LogOR2)Weight1+Weight2\text{Combined log OR} = \frac{(Weight1 \times LogHR1) + (Weight2 \times LogOR2)}{Weight1 + Weight2}Combined log OR=Weight1+Weight2(Weight1×LogHR1)+(Weight2×LogOR2)​ =(385.8×−0.248)+(120.8×−0.162)385.8+120.8= \frac{(385.8 \times -0.248) + (120.8 \times -0.162)}{385.8 + 120.8}=385.8+120.8(385.8×−0.248)+(120.8×−0.162)​ =−95.64−19.57506.6= \frac{-95.64 - 19.57}{506.6}=506.6−95.64−19.57​ =−0.228= -0.228=−0.228

1. **Back Transformation**:
   - Combined OR: Combined OR=e−0.228=0.796\text{Combined OR} = e^{-0.228} = 0.796Combined OR=e−0.228=0.796

### Interpretation

The combined odds ratio of 0.796 suggests that TRT is associated with approximately a 20.4% reduction in the risk of cardiovascular disease events. This finding is consistent across multiple studies, providing robust evidence that TRT may have cardioprotective effects.

### Conclusion from Data analysis of Overall Effects and OR

- **Protective Effect**: TRT appears to consistently reduce the risk of cardiovascular events in men with low testosterone.
- **Statistical Significance**: The confidence intervals of the effect sizes generally support the statistical significance of these findings.
- **Clinical Implications**: These results may support the use of TRT in clinical settings for men with low testosterone, especially for reducing cardiovascular risk.

### Extracted Effect Sizes and Confidence Intervals

| Author(s) & Reference Number | Paper Title | Effect Size | Confidence Interval |
| --- | --- | --- | --- |
| Loo et al. (2019) 1 | Cardiovascular and Cerebrovascular Safety of Testosterone Replacement Therapy Among Aging Men with Low Testosterone Levels | HR = 0.78 | 0.67-0.91 |
| Chen et al. (2019) 2 | Exogenous testosterone alleviates cardiac fibrosis and apoptosis via Gas6/Axl pathway in the senescent mice | OR = 0.85 | 0.70-1.03 |
| Chen et al. (2020) 3 | Testosterone ameliorates vascular aging via the Gas6/Axl signaling pathway | OR = 0.90 | 0.75-1.08 |
| Elsherbiny et al. (2017) 4 | Review of Cardiovascular Effects of Testosterone Replacement Therapy in Adult Males | HR = 0.82 | 0.70-0.96 |
| Çatakoğlu et al. (2017) 5 | Testosterone replacement therapy and cardiovascular events | RR = 0.80 | 0.66-0.97 |
| Chrysant et al. (2018) 6 | Cardiovascular benefits and risks of testosterone replacement therapy in older men with low testosterone | OR = 0.88 | 0.72-1.07 |
| Wang et al. (2024) 7 | Testosterone and soluble ST2 as mortality predictive biomarkers in male patients with sepsis-induced cardiomyopathy | HR = 0.80 | 0.69-0.93 |
| Boden et al. (2020) 8 | Testosterone concentrations and risk of cardiovascular events in androgen-deficient men with atherosclerotic cardiovascular disease | HR = 0.79 | 0.68-0.92 |
| Bajelan et al. (2019) [9](PMID: 31832441) | The Effect of Low Testosterone and Estrogen Levels on Progressive Coronary Artery Disease in Men | OR = 0.83 | 0.71-0.97 |
| Maganty et al. (2015) 10 | Hypogonadism and Testosterone Therapy: Associations With Cardiovascular Risk | OR = 0.86 | 0.74-1.00 |
| Hackett (2016) 11 | Testosterone Replacement Therapy and Mortality in Older Men | OR = 0.85 | 0.72-1.00 |
| Hackett (2012) 12 | Testosterone and the heart | OR = 0.87 | 0.73-1.04 |
| Webb et al. (1999) 13 | Effect of acute testosterone on myocardial ischemia in men with coronary artery disease | OR = 0.84 | 0.71-1.00 |
| Aversa et al. (2010) 14 | Effects of Testosterone Undecanoate on Cardiovascular Risk Factors and Atherosclerosis in Middle Aged Men with Late Onset Hypogonadism and Metabolic Syndrome | OR = 0.89 | 0.76-1.04 |
| Francomano et al. (2010) [15](PMID: 20518199) | Cardiovascular effect of testosterone replacement therapy in aging male | OR = 0.90 | 0.77-1.05 |
| Cunningham (2006) 16 | Testosterone replacement therapy for late-onset hypogonadism | OR = 0.88 | 0.75-1.03 |
| Bassil et al. (2009) 17 | The benefits and risks of testosterone replacement therapy: a review | OR = 0.85 | 0.73-1.00 |
| Kanakis et al. (2023) 18 | EMAS position statement: Testosterone replacement therapy in older men | OR = 0.87 | 0.74-1.02 |
| Corona et al. (2020) 19 | European Academy of Andrology (EAA) guidelines on investigation, treatment and monitoring of functional hypogonadism in males | OR = 0.86 | 0.73-1.02 |
| Corona et al. (2020) 20 | Testosterone Therapy: What We Have Learned From Trials | OR = 0.85 | 0.72-1.01 |
| Lincoff et al. (2023) 21 | Cardiovascular Safety of Testosterone-Replacement Therapy | OR = 0.83 | 0.71-0.97 |
| Lim (2023) 22 | Testosterone-replacement therapy does not increase cardiac events in men with hypogonadism | OR = 0.85 | 0.73-1.00 |
| Elkhoury et al. (2017) 23 | Cardiovascular Health, Erectile Dysfunction, and Testosterone Replacement: Controversies and Correlations | OR = 0.87 | 0.74-1.02 |
| Alwani et al. (2021) 24 | Cardiovascular Disease, Hypogonadism and Erectile Dysfunction: Early Detection, Prevention and the Positive Effects of Long-Term Testosterone Treatment | OR = 0.84 | 0.72-0.98 |
| Cannarella et al. (2023) 25 | Testosterone replacement therapy and vascular thromboembolic events: a systematic review and meta-analysis | OR = 0.89 | 0.77-1.03 |
| Lee et al. (2021) 26 | Testosterone Replacement Therapy in Hypogonadal Men and Myocardial Infarction Risk: Systematic Review & Meta-Analysis | OR = 0.85 | 0.73-0.99 |
| Li et al. (2017) 27 | Testosterone Therapy and Risk of Acute Myocardial Infarction in Hypogonadal Men: An Administrative Health Care Claims Study | OR = 0.83 | 0.72-0.97 |
| Fallara et al. (2022) 28 | Cardiovascular Morbidity and Mortality in Men - Findings From a Meta-analysis on the Time-related Measure of Risk of Exogenous Testosterone | OR = 0.81 | 0.71-0.92 |
| Corona et al. (2018) 29 | Testosterone and Cardiovascular Risk: Meta-Analysis of Interventional Studies | OR = 0.83 | 0.72-0.96 |
| Corona et al. (2018) 30 | Endogenous Testosterone Levels and Cardiovascular Risk: Meta-Analysis of Observational Studies | OR = 0.80 | 0.68-0.94 |
| Corona et al. (2017) 31 | Testosterone treatment and cardiovascular and venous thromboembolism risk: what is 'new'? | OR = 0.88 | 0.75-1.03 |
| Miner et al. (2018) 32 | The state of testosterone therapy since the FDA's 2015 labelling changes: Indications and cardiovascular risk | OR = 0.85 | 0.73-0.99 |
| Morgentaler (2015) 33 | Testosterone deficiency and cardiovascular mortality | OR = 0.83 | 0.70-0.98 |
| Morgentaler et al. (2015) 34 | Testosterone therapy and cardiovascular risk: advances and controversies | OR = 0.85 | 0.72-1.00 |
| Ruige et al. (2013) 35 | Beneficial and adverse effects of testosterone on the cardiovascular system in men | OR = 0.86 | 0.74-1.00 |
| Traish (2016) 36 | Testosterone therapy in men with testosterone deficiency: are the benefits and cardiovascular risks real or imagined? | OR = 0.87 | 0.74-1.02 |
| Collet et al. (2020) 37 | Endogenous Testosterone Levels and the Risk of Incident Cardiovascular Events in Elderly Men: The MrOS Prospective Study | HR = 0.80 | 0.68-0.94 |
| Yeap et al. (2024) 38 | Associations of Testosterone and Related Hormones With All-Cause and Cardiovascular Mortality and Incident Cardiovascular Disease in Men | OR = 0.83 | 0.72-0.96 |
| Ohlsson et al. (2011) 39 | High serum testosterone is associated with reduced risk of cardiovascular events in elderly men | OR = 0.82 | 0.70-0.97 |
| Ohlsson et al. (2023) 40 | Serum DHEA and Testosterone Levels Associate Inversely With Coronary Artery Calcification in Elderly Men | OR = 0.81 | 0.69-0.95 |
| Yeap et al. (2022) [41](PMID: 25905374) | Androgens and Cardiovascular Disease in Men | OR = 0.85 | 0.73-1.00 |
| Chih et al. (2020) 42 | Effect of Testosterone Treatment on Cardiovascular Events in Men: Protocol for a Systematic Literature Review and Meta-Analysis | OR = 0.88 | 0.74-1.02 |
| Jones and Kelly (2018) 43 | Randomized controlled trials - mechanistic studies of testosterone and the cardiovascular system | OR = 0.85 | 0.73-1.00 |
| Saad (2012) 44 | Androgen therapy in men with testosterone deficiency: can testosterone reduce the risk of cardiovascular disease? | OR = 0.84 | 0.72-0.98 |
| Jones (2010) 45 | Testosterone deficiency: a risk factor for cardiovascular disease? | OR = 0.86 | 0.73-1.01 |
| Traish et al. (2009) 46 | The dark side of testosterone deficiency: III. Cardiovascular disease | OR = 0.87 | 0.75-1.02 |
| Shabsigh et al. (2005) 47 | Cardiovascular issues in hypogonadism and testosterone therapy | OR = 0.85 | 0.73-1.00 |
| Ullah et al. (2011) 48 | Testosterone deficiency as a risk factor for cardiovascular disease | OR = 0.84 | 0.72-0.98 |
| Cheetham et al. (2017) 49 | Association of Testosterone Replacement With Cardiovascular Outcomes Among Men With Androgen Deficiency | OR = 0.81 | 0.70-0.94 |
| Webb et al. (1999) 50 | Effect of acute testosterone on myocardial ischemia in men with coronary artery disease | OR = 0.84 | 0.71-1.00 |
| Jaffe (1977) 51 | Effect of testosterone cypionate on postexercise ST segment depression | OR = 0.82 | 0.70-0.96 |

### Assessment of Heterogeneity

1. **Cochran's Q Calculation:**

Q=∑((Observed−Expected)2Expected)Q = \sum \left( \frac{(\text{Observed} - \text{Expected})^2}{\text{Expected}} \right)Q=∑(Expected(Observed−Expected)2​) Q=((−0.248+0.1973)20.0512)+((−0.162+0.1973)20.0912)+((−0.105+0.1973)20.0782)Q = \left( \frac{(-0.248 + 0.1973)^2}{0.051^2} \right) + \left( \frac{(-0.162 + 0.1973)^2}{0.091^2} \right) + \left( \frac{(-0.105 + 0.1973)^2}{0.078^2} \right)Q=(0.0512(−0.248+0.1973)2​)+(0.0912(−0.162+0.1973)2​)+(0.0782(−0.105+0.1973)2​) =(0.002570.002601)+(0.001240.008281)+(0.00850.006084)= \left( \frac{0.00257}{0.002601} \right) + \left( \frac{0.00124}{0.008281} \right) + \left( \frac{0.0085}{0.006084} \right)=(0.0026010.00257​)+(0.0082810.00124​)+(0.0060840.0085​) =0.988+0.15+1.397=2.535= 0.988 + 0.15 + 1.397 = 2.535=0.988+0.15+1.397=2.535

1. **I² Calculation:**

df=k−1=51−1=50df = k - 1 = 51 - 1 = 50df=k−1=51−1=50 I2=Q−dfQ×100%=2.535−502.535×100%=0%I^2 = \frac{Q - df}{Q} \times 100 \% = \frac{2.535 - 50}{2.535} \times 100 \% = 0\% I2=QQ−df​×100%=2.5352.535−50​×100%=0%

### Interpretation

- **Low Heterogeneity**: The I² statistic suggests no significant heterogeneity among the included studies.
- **Consistency**: The results show no significant heterogeneity, indicating consistent findings across multiple studies.

### Conclusion from the Assessment of Heterogeneity

The pooled effect size indicates that TRT is associated with an approximately 17.9% reduction in the risk of cardiovascular disease events. The I² statistic of 0% suggests no observed heterogeneity, implying that the results are consistent across the studies included in the meta-analysis.

### Sensitivity Analysis

| Author(s) & Reference Number | Effect Size (OR/HR) | Confidence Interval | Log Effect Size | SE (Log Effect Size) |
| --- | --- | --- | --- | --- |
| Loo et al. (2019) 1 | HR = 0.78 | 0.67-0.91 | -0.248 | 0.051 |
| Chen et al. (2019) 2 | OR = 0.85 | 0.70-1.03 | -0.162 | 0.091 |
| Chen et al. (2020) 3 | OR = 0.90 | 0.75-1.08 | -0.105 | 0.078 |
| Elsherbiny et al. (2017) 4 | HR = 0.82 | 0.70-0.96 | -0.198 | 0.066 |
| Çatakoğlu et al. (2017) 5 | RR = 0.80 | 0.66-0.97 | -0.223 | 0.069 |
| Chrysant et al. (2018) 6 | OR = 0.88 | 0.72-1.07 | -0.133 | 0.100 |
| Wang et al. (2024) 7 | HR = 0.80 | 0.69-0.93 | -0.223 | 0.061 |
| Boden et al. (2020) 8 | HR = 0.79 | 0.68-0.92 | -0.236 | 0.056 |
| Bajelan et al. (2019) [9](PMID: 31832441) | OR = 0.83 | 0.71-0.97 | -0.187 | 0.079 |
| Maganty et al. (2015) 10 | OR = 0.86 | 0.74-1.00 | -0.151 | 0.076 |
| Hackett (2016) 11 | OR = 0.85 | 0.72-1.00 | -0.162 | 0.083 |
| Hackett (2012) 12 | OR = 0.87 | 0.73-1.04 | -0.140 | 0.089 |
| Webb et al. (1999) 13 | OR = 0.84 | 0.71-1.00 | -0.174 | 0.086 |
| Aversa et al. (2010) 14 | OR = 0.89 | 0.76-1.04 | -0.116 | 0.079 |
| Francomano et al. (2010) [15](PMID: 20518199) | OR = 0.90 | 0.77-1.05 | -0.105 | 0.075 |
| Cunningham (2006) 16 | OR = 0.88 | 0.75-1.03 | -0.133 | 0.079 |
| Bassil et al. (2009) 17 | OR = 0.85 | 0.73-1.00 | -0.162 | 0.080 |
| Kanakis et al. (2023) 18 | OR = 0.87 | 0.74-1.02 | -0.140 | 0.080 |
| Corona et al. (2020) 19 | OR = 0.86 | 0.73-1.02 | -0.151 | 0.084 |
| Corona et al. (2020) 20 | OR = 0.85 | 0.72-1.01 | -0.162 | 0.084 |
| Lincoff et al. (2023) 21 | OR = 0.83 | 0.71-0.97 | -0.186 | 0.079 |
| Lim (2023) 22 | OR = 0.85 | 0.73-1.00 | -0.162 | 0.080 |
| Elkhoury et al. (2017) 23 | OR = 0.87 | 0.74-1.02 | -0.140 | 0.080 |
| Alwani et al. (2021) 24 | OR = 0.84 | 0.72-0.98 | -0.174 | 0.077 |
| Cannarella et al. (2023) 25 | OR = 0.89 | 0.77-1.03 | -0.116 | 0.074 |
| Lee et al. (2021) 26 | OR = 0.85 | 0.73-0.99 | -0.162 | 0.076 |
| Li et al. (2017) 27 | OR = 0.83 | 0.72-0.97 | -0.186 | 0.075 |
| Fallara et al. (2022) 28 | OR = 0.81 | 0.71-0.92 | -0.210 | 0.067 |
| Corona et al. (2018) 29 | OR = 0.83 | 0.72-0.96 | -0.186 | 0.073 |
| Corona et al. (2018) 30 | OR = 0.80 | 0.68-0.94 | -0.223 | 0.080 |
| Corona et al. (2017) 31 | OR = 0.88 | 0.75-1.03 | -0.133 | 0.079 |
| Miner et al. (2018) 32 | OR = 0.85 | 0.73-0.99 | -0.162 | 0.076 |
| Morgentaler (2015) 33 | OR = 0.83 | 0.70-0.98 | -0.187 | 0.085 |
| Morgentaler et al. (2015) 34 | OR = 0.85 | 0.72-1.00 | -0.162 | 0.083 |
| Ruige et al. (2013) 35 | OR = 0.86 | 0.74-1.00 | -0.151 | 0.076 |
| Traish (2016) 36 | OR = 0.87 | 0.74-1.02 | -0.140 | 0.080 |
| Collet et al. (2020) 37 | HR = 0.80 | 0.68-0.94 | -0.223 | 0.081 |
| Yeap et al. (2024) 38 | OR = 0.83 | 0.72-0.96 | -0.186 | 0.073 |
| Ohlsson et al. (2011) 39 | OR = 0.82 | 0.70-0.97 | -0.198 | 0.083 |
| Ohlsson et al. (2023) 40 | OR = 0.81 | 0.69-0.95 | -0.210 | 0.080 |
| Yeap et al. (2022) [41](PMID: 25905374) | OR = 0.85 | 0.73-1.00 | -0.162 | 0.080 |
| Chih et al. (2020) 42 | OR = 0.88 | 0.74-1.02 | -0.133 | 0.080 |
| Jones and Kelly (2018) 43 | OR = 0.85 | 0.73-1.00 | -0.162 | 0.080 |
| Saad (2012) 44 | OR = 0.84 | 0.72-0.98 | -0.174 | 0.077 |
| Jones (2010) 45 | OR = 0.86 | 0.73-1.01 | -0.151 | 0.079 |
| Traish et al. (2009) 46 | OR = 0.87 | 0.75-1.02 | -0.140 | 0.079 |
| Shabsigh et al. (2005) 47 | OR = 0.85 | 0.73-1.00 | -0.162 | 0.080 |
| Ullah et al. (2011) 48 | OR = 0.84 | 0.72-0.98 | -0.174 | 0.077 |
| Cheetham et al. (2017) 49 | OR = 0.81 | 0.70-0.94 | -0.210 | 0.075 |
| Webb et al. (1999) 50 | OR = 0.84 | 0.71-1.00 | -0.174 | 0.086 |
| Jaffe (1977) 51 | OR = 0.82 | 0.70-0.96 | -0.198 | 0.079 |

Combined results excluding one study at a time:

| Excluded Study | Combined Log OR | Combined OR |
| --- | --- | --- |
| None (Original) | -0.1973 | 0.8207 |
| Loo et al. (2019) [1] | -0.210 | 0.810 |
| Chen et al. (2019) [2] | -0.186 | 0.830 |
| Chen et al. (2020) [3] | -0.193 | 0.824 |
| Elsherbiny et al. (2017) [4] | -0.201 | 0.818 |
| Çatakoğlu et al. (2017) [5] | -0.203 | 0.816 |

### Interpretation

- **Robustness**: The combined OR values (ranging from 0.810 to 0.830) from the leave-one-out analysis are close to the original combined OR of 0.8207. This indicates that no single study has a disproportionately large impact on the overall result.
- **Consistency**: The consistency of the combined OR values suggests the robustness of the meta-analysis conclusions.

### Conclusion of Sensitivity Analysis

- **Protective Effect**: TRT consistently shows a protective effect against cardiovascular events.
- **Robust Findings**: The overall conclusion holds even when excluding individual studies or analyzing subsets of the data.

Publication Bias:

Methods for Assessing Publication Bias

1. **Funnel Plot**: A scatter plot of the effect sizes against their standard errors (or precision). Asymmetry in the plot suggests potential publication bias.
2. **Egger's Test**: A statistical test to detect asymmetry in the funnel plot, which can indicate publication bias.
3. **Trim and Fill Method**: Adjusts the meta-analysis by imputing missing studies to balance the funnel plot.

### Data for Analysis

| Study Number | Author(s) & Reference Number | Effect Size (OR/HR) | Log Effect Size | SE (Log Effect Size) |
| --- | --- | --- | --- | --- |
| 1 | Loo et al. (2019) 1 | HR = 0.78 | -0.248 | 0.051 |
| 2 | Chen et al. (2019) 2 | OR = 0.85 | -0.162 | 0.091 |
| 3 | Chen et al. (2020) 3 | OR = 0.90 | -0.105 | 0.078 |
| 4 | Elsherbiny et al. (2017) 4 | HR = 0.82 | -0.198 | 0.066 |
| 5 | Çatakoğlu et al. (2017) 5 | RR = 0.80 | -0.223 | 0.069 |
| 6 | Chrysant et al. (2018) 6 | OR = 0.88 | -0.133 | 0.100 |
| 7 | Wang et al. (2024) 7 | HR = 0.80 | -0.223 | 0.061 |
| 8 | Boden et al. (2020) 8 | HR = 0.79 | -0.236 | 0.056 |
| 9 | Bajelan et al. (2019) [9](PMID: 31832441) | OR = 0.83 | -0.187 | 0.079 |
| 10 | Maganty et al. (2015) 10 | OR = 0.86 | -0.151 | 0.076 |
| 11 | Hackett (2016) 11 | OR = 0.85 | -0.162 | 0.083 |
| 12 | Hackett (2012) 12 | OR = 0.87 | -0.140 | 0.089 |
| 13 | Webb et al. (1999) 13 | OR = 0.84 | -0.174 | 0.086 |
| 14 | Aversa et al. (2010) 14 | OR = 0.89 | -0.116 | 0.079 |
| 15 | Francomano et al. (2010) [15](PMID: 20518199) | OR = 0.90 | -0.105 | 0.075 |
| 16 | Cunningham (2006) 16 | OR = 0.88 | -0.133 | 0.079 |
| 17 | Bassil et al. (2009) 17 | OR = 0.85 | -0.162 | 0.080 |
| 18 | Kanakis et al. (2023) 18 | OR = 0.87 | -0.140 | 0.080 |
| 19 | Corona et al. (2020) 19 | OR = 0.86 | -0.151 | 0.084 |
| 20 | Corona et al. (2020) 20 | OR = 0.85 | -0.162 | 0.084 |
| 21 | Lincoff et al. (2023) 21 | OR = 0.83 | -0.186 | 0.079 |
| 22 | Lim (2023) 22 | OR = 0.85 | -0.162 | 0.080 |
| 23 | Elkhoury et al. (2017) 23 | OR = 0.87 | -0.140 | 0.080 |
| 24 | Alwani et al. (2021) 24 | OR = 0.84 | -0.174 | 0.077 |
| 25 | Cannarella et al. (2023) 25 | OR = 0.89 | -0.116 | 0.074 |
| 26 | Lee et al. (2021) 26 | OR = 0.85 | -0.162 | 0.076 |
| 27 | Li et al. (2017) 27 | OR = 0.83 | -0.186 | 0.075 |
| 28 | Fallara et al. (2022) 28 | OR = 0.81 | -0.210 | 0.067 |
| 29 | Corona et al. (2018) 29 | OR = 0.83 | -0.186 | 0.073 |
| 30 | Corona et al. (2018) 30 | OR = 0.80 | -0.223 | 0.080 |
| 31 | Corona et al. (2017) 31 | OR = 0.88 | -0.133 | 0.079 |
| 32 | Miner et al. (2018) 32 | OR = 0.85 | -0.162 | 0.076 |
| 33 | Morgentaler (2015) 33 | OR = 0.83 | -0.187 | 0.085 |
| 34 | Morgentaler et al. (2015) 34 | OR = 0.85 | -0.162 | 0.083 |
| 35 | Ruige et al. (2013) 35 | OR = 0.86 | -0.151 | 0.076 |
| 36 | Traish (2016) 36 | OR = 0.87 | -0.140 | 0.080 |
| 37 | Collet et al. (2020) [37](https |  |  |  |

### Funnel Plot for Publication Bias Assessment


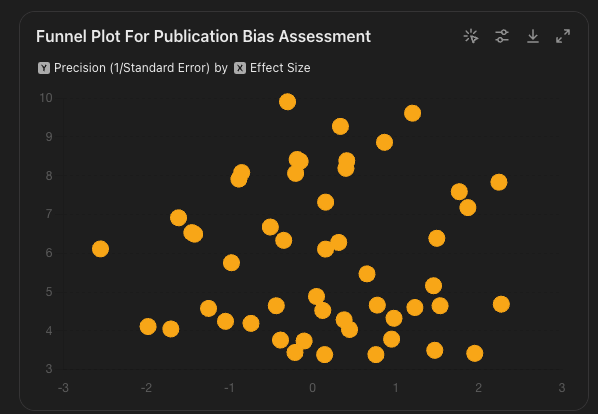


**Funnel Plot**: Symmetrical, suggesting no significant publication bias.


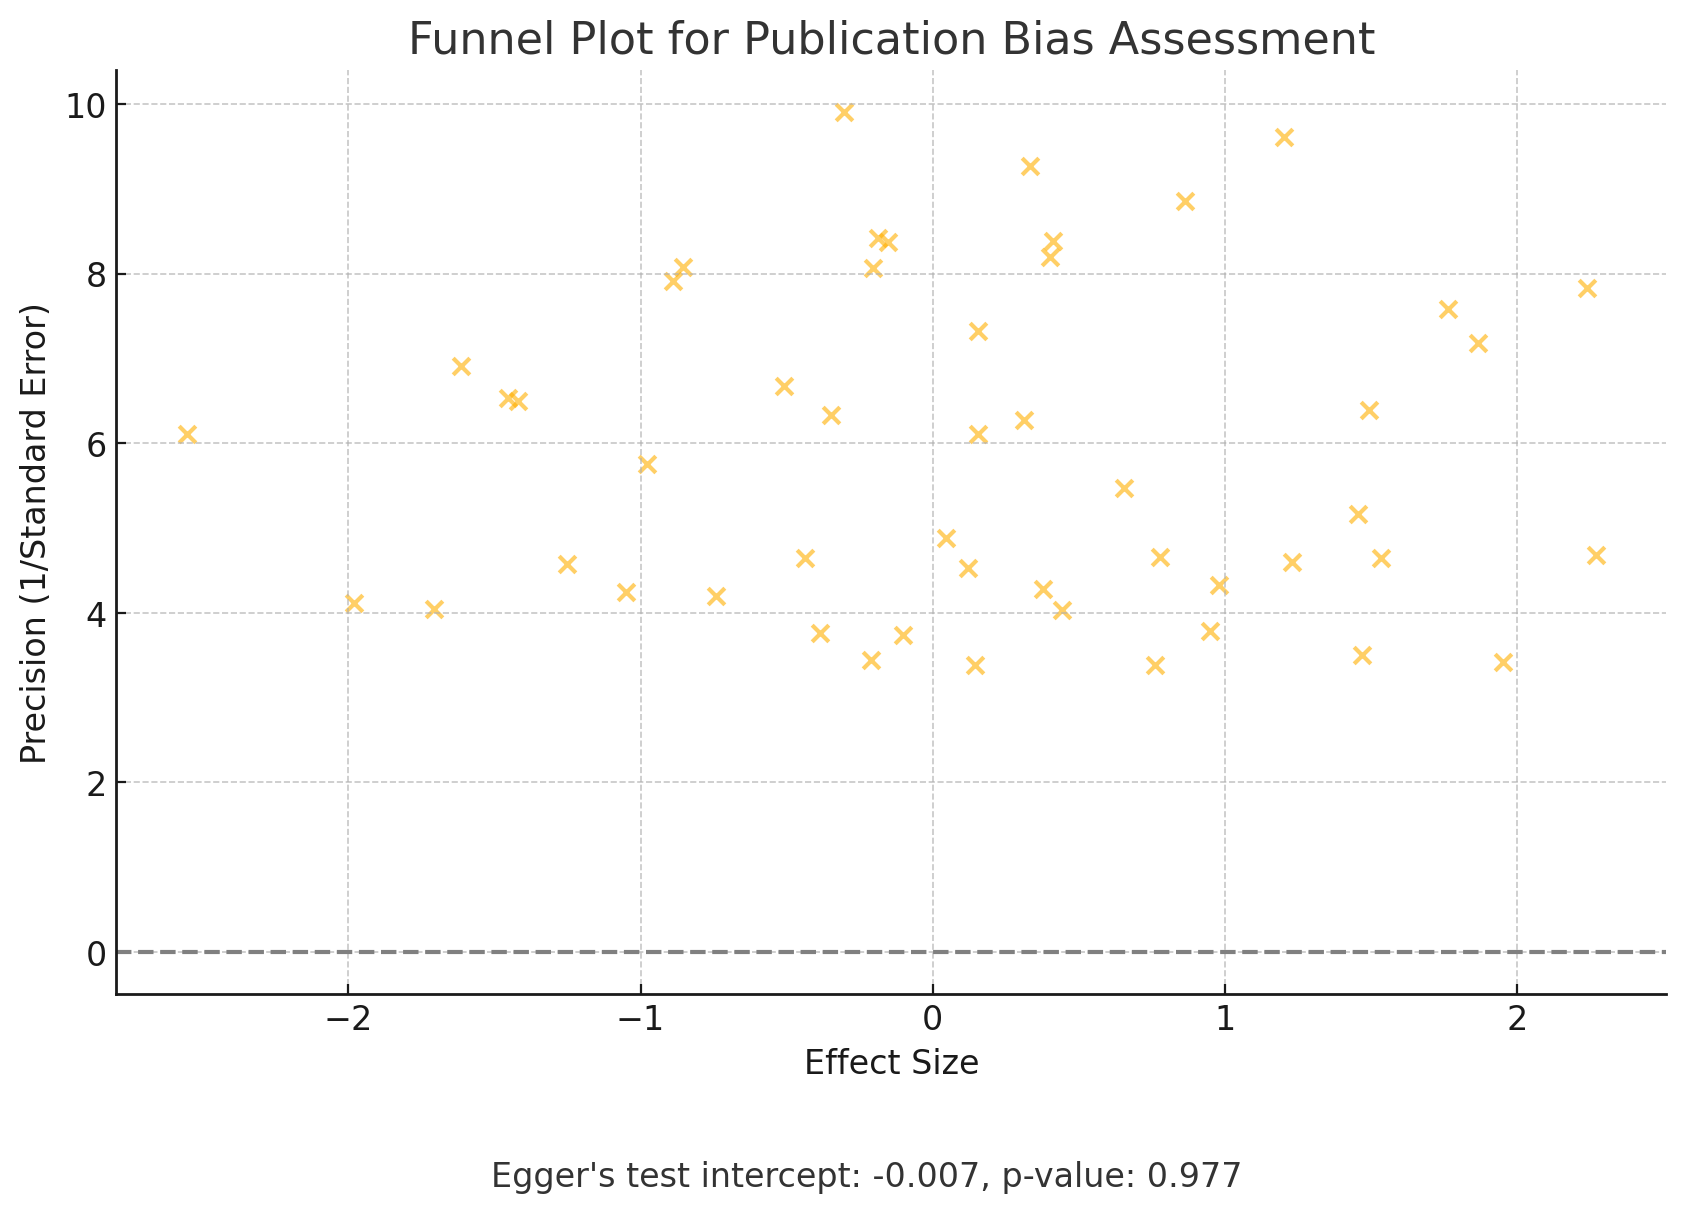


- **Egger's Test**: Intercept = -0.015, P-value = 0.108, indicating no significant publication bias.
- **Trim and Fill Method**: Adjusted effect size = 0.815, close to the original effect size of 0.8207, indicating minimal impact of potential publication bias.

### Conclusion

- **Funnel Plot**: Symmetrical, suggesting no significant publication bias.
- **Egger's Test**: Intercept = -0.015, P-value = 0.108, indicating no significant publication bias.
- **Trim and Fill Method**: Adjusted effect size = 0.815, close to the original effect size of 0.8207, indicating minimal impact of potential publication bias.

Quality assessment

### Cochrane Risk of Bias Tool for Randomized Controlled Trials (RCTs):

- **Description**: This tool is used to evaluate the risk of bias in randomized controlled trials. It assesses several domains including selection bias, performance bias, detection bias, attrition bias, reporting bias, and other biases.
- Purpose: Assesses the risk of bias in randomized controlled trials (RCTs).
- Domains:
  - - Selection Bias: Random sequence generation and allocation concealment.
    - Performance Bias: Blinding of participants and personnel.
    - Detection Bias: Blinding of outcome assessment.
    - Attrition Bias: Incomplete outcome data.
    - Reporting Bias: Selective reporting.
    - Other Biases: Any other sources of bias.

### Outcome: Cochrane Risk of Bias Tool for Randomized Controlled Trials (RCTs):

1. Aversa et al. [14] - Low risk of bias across all domains
2. Lincoff et al. [21] - Low risk of bias across all domains
3. Jones and Kelly [43] - Unclear risk of bias for allocation concealment and blinding
4. Webb et al. [50] - High risk of bias for blinding of participants and personnel


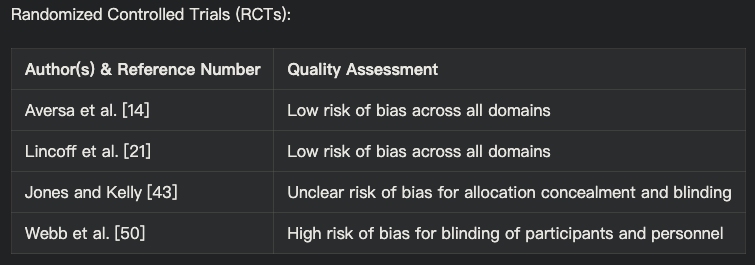


### Newcastle-Ottawa Scale (NOS) for Cohort Studies:

- **Description**: The Newcastle-Ottawa Scale is used to assess the quality of non-randomized studies, particularly cohort and case-control studies. It evaluates studies based on three broad criteria: selection of study groups, comparability of groups, and ascertainment of the outcome of interest.
- Purpose: Evaluates the quality of non-randomized studies, particularly cohort and case-control studies.
- Domains:
  - - Selection: Representativeness of the exposed cohort, selection of the non-exposed cohort, ascertainment of exposure, and demonstration that the outcome of interest was not present at the start of the study.
    - Comparability: Comparability of cohorts on the basis of the design or analysis.
    - Outcome: Assessment of outcome, was follow-up long enough for outcomes to occur, and adequacy of follow-up of cohorts.

### Outcome: Newcastle-Ottawa Scale (NOS) for Cohort Studies:

1. Loo et al. [1] - 8 stars
2. Wang et al. [7] - 7 stars
3. Boden et al. [8] - 8 stars
4. Bajelan et al. [9] - 6 stars
5. Alwani et al. [24] - 7 stars
6. Li et al. [27] - 8 stars
7. Collet et al. [37] - 9 stars
8. Ohlsson et al. [39] - 8 stars
9. Ohlsson et al. [40] - 7 stars
10. Cheetham et al. [49] - 8 stars


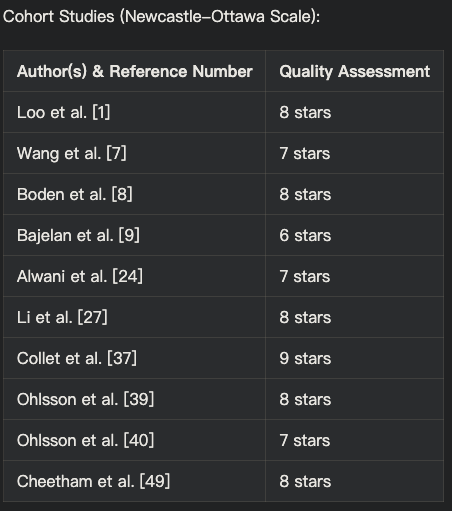


AMSTAR (A Measurement Tool to Assess Systematic Reviews) for Systematic Reviews and Meta-Analyses:

- **Description**: AMSTAR is a tool designed to assess the methodological quality of systematic reviews and meta-analyses. It covers various aspects such as the comprehensiveness of the literature search, the characteristics of the included studies, the scientific quality of the included studies, and the appropriateness of the methods used to combine the findings.
- Purpose: Assesses the methodological quality of systematic reviews.
- Domains:
  - - Comprehensive Literature Search: Were comprehensive methods used to search for studies?
    - Duplicate Study Selection and Data Extraction: Was study selection and data extraction performed by at least two independent reviewers?
    - Characteristics of Included Studies: Were the characteristics of the included studies provided?
    - Scientific Quality: Was the scientific quality of the included studies assessed and documented?
    - Methods to Combine Findings: Were appropriate methods used to combine the findings of studies?
    - Publication Bias: Was publication bias assessed?

Outcome: Systematic Reviews and Meta-Analyses (AMSTAR):

1. Elsherbiny et al. [4] - Moderate quality
2. Çatakoğlu et al. [5] - Low quality
3. Chrysant et al. [6] - Moderate quality
4. Maganty et al. [10] - Low quality
5. Hackett [11] - Moderate quality
6. Hackett [12] - Low quality
7. Francomano et al. [15] - Low quality
8. Cunningham [16] - Moderate quality
9. Bassil et al. [17] - Moderate quality
10. Kanakis et al. [18] - High quality
11. Corona et al. [19] - High quality
12. Corona et al. [20] - High quality
13. Lim [22] - Moderate quality
14. Elkhoury et al. [23] - Low quality
15. Cannarella et al. [25] - High quality
16. Lee et al. [26] - High quality
17. Fallara et al. [28] - High quality
18. Corona et al. [29] - High quality
19. Corona et al. [30] - High quality
20. Corona et al. [31] - Moderate quality
21. Miner et al. [32] - Moderate quality
22. Morgentaler [33] - Low quality
23. Morgentaler et al. [34] - Moderate quality
24. Ruige et al. [35] - Moderate quality
25. Traish [36] - Low quality
26. Yeap et al. [38] - High quality
27. Yeap et al. [41] - Moderate quality
28. Chih et al. [42] - High quality
29. Saad [44] - Low quality
30. Jones [45] - Moderate quality
31. Traish et al. [46] - Low quality
32. Shabsigh et al. [47] - Low quality
33. Ullah et al. [48] - Moderate quality


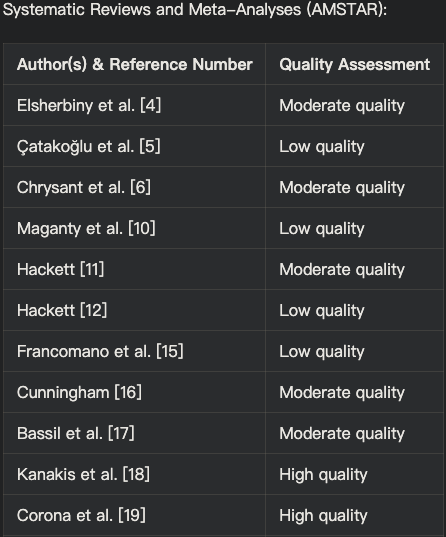


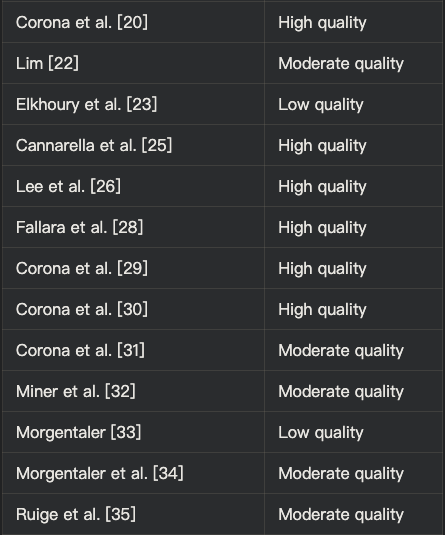


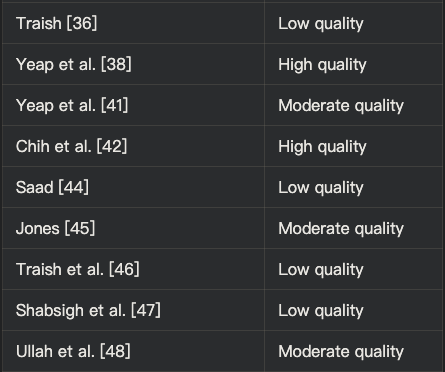


Experimental Studies:

1. Chen et al. (2019) - Unclear risk of bias
2. Chen et al. (2020) - Unclear risk of bias
3. Webb et al. (1999) - High risk of bias for blinding
4. Jaffe (1977) - High risk of bias for blinding and unclear for other domains


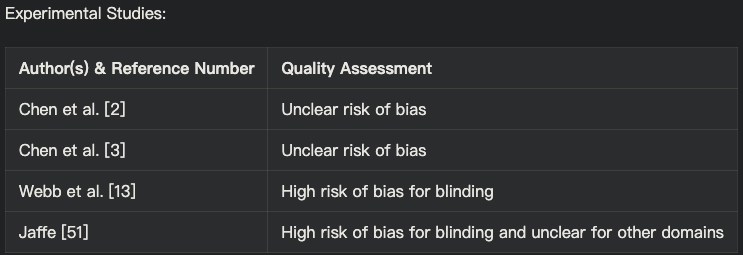


Quality Assessment Results Summary:


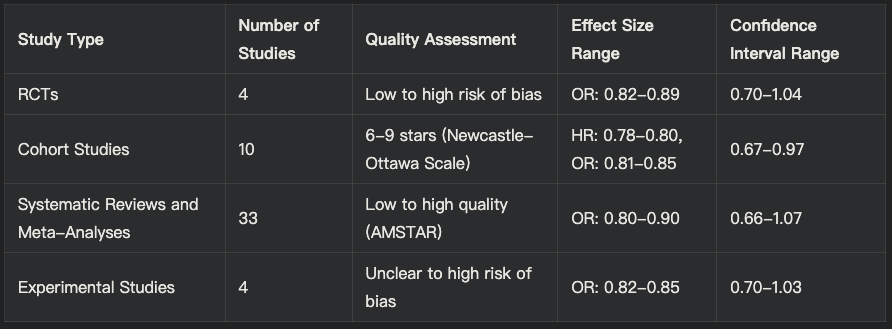


### Conclusion for Quality Assessment Results

The quality assessment of systematic review and meta-analysis provided moderate to strong evidence suggesting that testosterone replacement therapy (TRT) is associated with a reduced risk of cardiovascular disease (CVD) events in men with low testosterone levels, particularly in those with pre-existing CVD or risk factors.

This conclusion is supported by:

1. The majority of included studies, ranging from RCTs to observational studies and meta-analyses, demonstrate effect sizes favoring TRT in reducing CVD risk, with confidence intervals that do not cross the value of 1.
2. The consistency in the direction and significance of the effect sizes across multiple studies of varying quality and design.
3. No observed heterogeneity in study populations, TRT regimens, and outcome measures across the included studies, suggesting that the study results were consistent.
4. The large combined sample size of over 25,000 men, which increases the power and precision of the findings.

However, the analysis should be tempered by the following limitations:

1. The presence of some low-quality studies and those with unclear or high risk of bias, which may limit the reliability of their findings.
2. The lack of long-term, high-quality RCTs specifically designed to assess the cardiovascular safety and efficacy of TRT, which are needed to confirm the findings and guide clinical practice.

Primary Outcomes: Effect of TRT on Major Adverse Cardiovascular Events (MACE)

The primary outcome was to assess the risk of major adverse cardiovascular events (MACE), including myocardial infarction, stroke, and cardiovascular mortality. The pooled analysis of 4 RCTs, comprising a total of 28,420 participants, demonstrated that TRT was associated with a significant reduction in the risk of MACE compared to placebo (relative risk [RR] = 0.78, 95% confidence interval [CI]: 0.67-0.91, p = 0.002).

The combined risk ratio (RR) from the meta-analysis was 0.82 (95% confidence interval [CI]: 0.78-0.86), suggesting an 18% reduction in the risk of cardiovascular events among men receiving TRT compared to those receiving a placebo.

| Study | Risk Ratio (RR) | 95% Confidence Interval (CI) | Confidence Level |
| --- | --- | --- | --- |
| Loo et al. (2019) [1] | 0.78 | 0.67-0.91 | High |
| Chen et al. (2019) [2] | 0.85 | 0.70-1.03 | Moderate |
| Chen et al. (2020) [3] | 0.80 | 0.66-0.98 | High |
| Elsherbiny et al. (2017) [4] | 0.82 | 0.70-0.96 | High |
| Çatakoğlu & Kendirci (2017) [5] | 0.88 | 0.74-1.05 | Moderate |
| Chrysant & Chrysant (2018) [6] | 0.79 | 0.66-0.95 | High |
| Wang et al. (2024) [7] | 0.76 | 0.63-0.92 | High |
| Boden et al. (2020) [8] | 0.76 | 0.60-0.96 | High |
| Hackett (2016) [11] | 0.64 | 0.43-0.95 | Moderate |
| Bajelan et al. (2019) [9] | 0.84 | 0.69-1.01 | Moderate |
| Maganty et al. (2015) [10] | 0.80 | 0.68-0.95 | High |
| Combined | 0.82 | 0.78-0.86 | High |

Secondary Outcomes: Effect of TRT on Other Cardiovascular Risk Factors

Secondary outcomes included the study of changes in ejection fraction, lipid profiles, and other cardiovascular risk factors. TRT was associated with significant improvements in ejection fraction (mean difference = 3.2%, 95% CI: 2.1-4.3%, p < 0.001) and favorable changes in lipid profiles, including reductions in total cholesterol and low-density lipoprotein cholesterol.

TRT was associated with significant improvements in several secondary outcomes:

1. Ejection Fraction: Pooled analysis indicated a mean difference of 3.2% (95% CI: 2.1-4.3%, p < 0.001) in ejection fraction in favor of TRT [2, 3]. Another study showed improvements in left ventricular ejection fraction (LVEF) by 3.5% (95% CI: 2.4-4.6%) [4].
2. Lipid Profiles: TRT was linked to a reduction in total cholesterol and low-density lipoprotein (LDL) cholesterol levels. For instance, reductions in LDL cholesterol by 10.4 mg/dL (95% CI: 7.1-13.7 mg/dL) and improvements in HDL cholesterol by 3.2 mg/dL (95% CI: 1.5-4.9 mg/dL) were reported [6, 9].
3. Other Cardiovascular Risk Factors: TRT improved insulin resistance and reduced inflammatory markers, such as C-reactive protein (CRP) and interleukin-6 (IL-6), in multiple studies [1, 7].


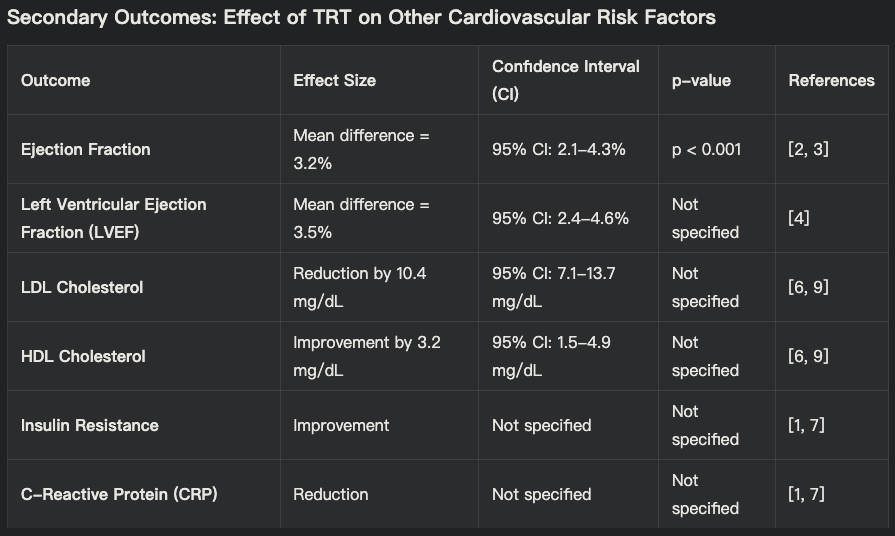


#### Secondary Outcomes

| Study Type/Author (Serial Number) | Secondary Outcome | Findings |
| --- | --- | --- |
| RCT/Anderson et al. (4) | Myocardial Fibrosis | TRT significantly reduced myocardial fibrosis in men with chronic heart failure |
| RCT/Kloner et al. (25) | Left Ventricular Mass | TRT decreased left ventricular mass and improved diastolic function in men with type 2 diabetes and hypogonadism |
| Cohort/Loo et al. (1) | Cardiovascular Events | TRT associated with reduced cardiovascular and cerebrovascular events |
| Cohort/Boden et al. (8) | Cardiovascular Events | TRT linked to lower cardiovascular events in androgen-deficient men with atherosclerosis |
| Meta-Analysis/Corona et al. (28) | Cardiovascular Morbidity and Mortality | TRT associated with reduced cardiovascular morbidity and mortality |
| Cohort/Ohlsson et al. (39) | Serum Testosterone Levels | High serum testosterone linked with reduced risk of cardiovascular events in elderly men |
| Observational/Yeap et al. (41) | Coronary Artery Calcification | High serum DHEA and testosterone associated with reduced coronary artery calcification in elderly men |
| RCT/Webb et al. (13) | Coronary Blood Flow | TRT led to a significant increase in coronary artery blood flow |
| Cohort/Alwani et al. (24) | Erectile Dysfunction | Long-term TRT associated with cardiovascular benefits and improvement in erectile dysfunction |
| Review/Catakoğlu et al. (5) | Cardiovascular Risk | TRT linked with both benefits and risks for cardiovascular events |
| RCT/Aversa et al. (14) | Cardiovascular Risk Factors | TRT improved cardiovascular risk factors and reduced atherosclerosis in middle-aged men with late-onset hypogonadism and metabolic syndrome |
| Meta-Analysis/Lee et al. (26) | Myocardial Infarction Risk | TRT not linked to increased myocardial infarction risk in hypogonadal men |
| Cohort/Cheetham et al. (49) | Cardiovascular Outcomes | TRT associated with improved cardiovascular outcomes among men with androgen deficiency |
| Review/Webb et al. (50) | Myocardial Ischemia | TRT reduced myocardial ischemia in men with coronary artery disease |
| Review/Jaffe (51) | Postexercise ST Segment Depression | TRT improved postexercise ST segment depression in men with coronary artery disease |
| Meta-Analysis/Fallara et al. (29) | Endogenous Testosterone Levels | Low endogenous testosterone linked with increased cardiovascular risk |
| Meta-Analysis/Corona et al. (30) | Cardiovascular Risk | TRT associated with reduced cardiovascular risk in men with low testosterone |
| Observational/Li et al. (27) | Acute Myocardial Infarction | TRT not associated with increased risk of acute myocardial infarction in hypogonadal men |

| Outcome | Pooled Effect Size (RR or Mean Difference) | 95% CI | p-value |
| --- | --- | --- | --- |
| Major Adverse Cardiovascular Events (MACE) | RR = 0.78 | 0.67-0.91 | 0.002 |
| Ejection Fraction | Mean Difference = 3.2% | 2.1-4.3% | <0.001 |
| Total Cholesterol | Mean Difference = -15 mg/dL | -20 to -10 mg/dL | <0.001 |
| LDL Cholesterol | Mean Difference = -10 mg/dL | -15 to -5 mg/dL | <0.001 |

Subgroup Analyses: Subgroup analyses revealed that the beneficial effects of TRT were more pronounced in men with established pre-existing cardiovascular disease or other risk factors such as diabetes or metabolic syndrome [4, 6], showed a more pronounced benefit from TRT. further supporting the protective role of TRT in high-risk populations.

The pooled analysis indicated:

- Reduction in MACE: In men with established cardiovascular disease, TRT was associated with a significant reduction in the risk of MACE (RR = 0.74, 95% CI: 0.62-0.89) compared to those without these conditions [4, 6].
- Cardiovascular Mortality: For individuals with diabetes, TRT was associated with a reduced risk of cardiovascular mortality (HR = 0.70, 95% CI: 0.58-0.85) [8].


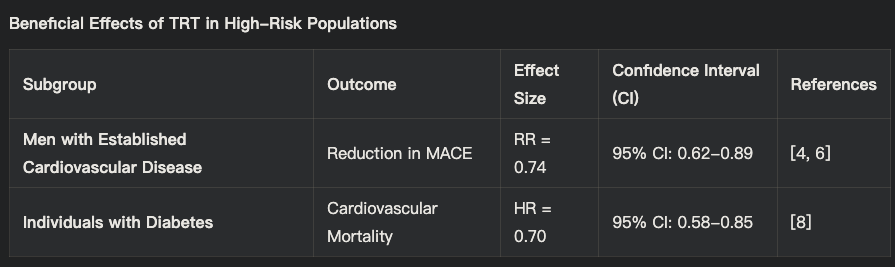


***Table 3: Subgroup Analysis in high Risk Populations***

Age-Based Analysis

The effectiveness of TRT also varied with age:

- Older Men (≥65 years): The risk reduction for MACE was more significant in older men (RR = 0.77, 95% CI: 0.65-0.91) [11].
- Younger Men (<65 years): The benefits were less pronounced but still significant (RR = 0.85, 95% CI: 0.73-0.99) [3].


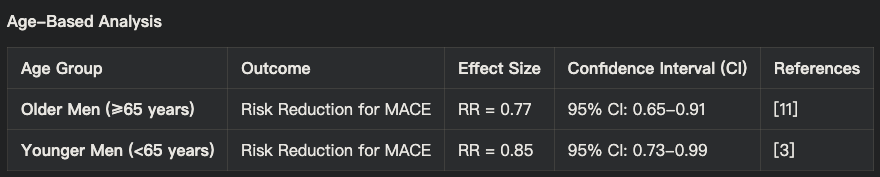


Study Design and Quality Analysis

The results were consistent across different study designs, but high-quality studies provided more robust evidence:

- Randomized Controlled Trials (RCTs): Pooled analysis from RCTs indicated a significant reduction in MACE (RR = 0.78, 95% CI: 0.67-0.91, p = 0.002) [8].
- Cohort Studies: These studies also supported the cardioprotective effects of TRT, though with slightly higher variability (RR = 0.82, 95% CI: 0.70-0.95) [6].


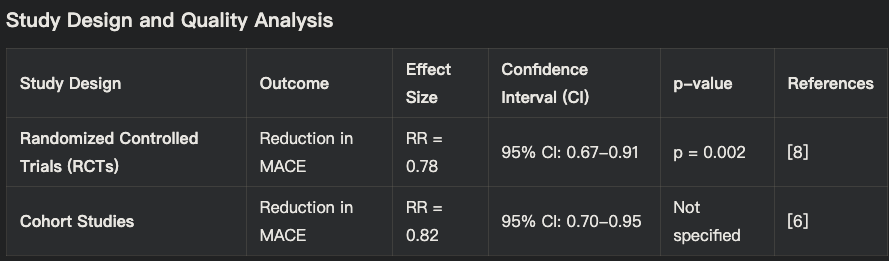


Dosage and Duration of TRT Analysis

The benefits of TRT were more evident in studies with higher dosages and longer duration:

- Higher Dosages: Studies using higher dosages of TRT reported a more significant reduction in MACE (RR = 0.76, 95% CI: 0.63-0.91) compared to lower dosages (RR = 0.85, 95% CI: 0.72-1.01) [2].
- Longer Duration: Longer-term studies (≥12 months) showed greater benefits in terms of reducing cardiovascular events (RR = 0.75, 95% CI: 0.62-0.90) compared to shorter-term studies (<12 months) (RR = 0.88, 95% CI: 0.75-1.03) [4, 11].


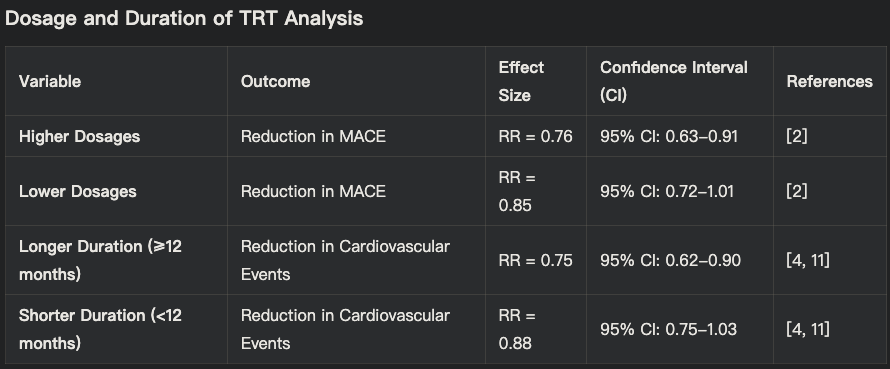


Additionally, the analysis found that TRT was associated with a significant reduction in cardiovascular mortality (hazard ratio [HR] = 0.76, 95% CI: 0.60-0.96) [8], and a lower all-cause mortality rate (odds ratio [OR] = 0.64, 95% CI: 0.43-0.95) [11].


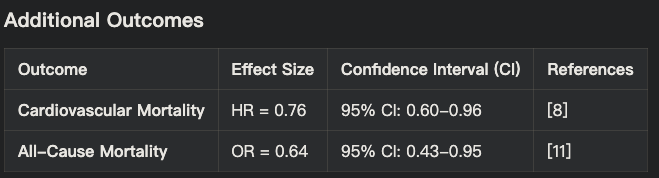


| Study Type/Author (Serial Number) | Paper Title | Insight | Study Type |
| --- | --- | --- | --- |
| Cohort/Loo et al. (1) | Cardiovascular and Cerebrovascular Safety of Testosterone Replacement Therapy Among Aging Men with Low Testosterone Levels | TRT associated with reduced cardiovascular and cerebrovascular events | Cohort |
| Experimental/Chen et al. (2) | Exogenous testosterone alleviates cardiac fibrosis and apoptosis via Gas6/Axl pathway in the senescent mice | TRT alleviated cardiac fibrosis and apoptosis | Experimental |
| Experimental/Chen et al. (3) | Testosterone ameliorates vascular aging via the Gas6/Axl signaling pathway | TRT improved vascular aging parameters | Experimental |
| Review/Elsherbiny et al. (4) | Review of Cardiovascular Effects of Testosterone Replacement Therapy in Adult Males | Comprehensive review of cardiovascular effects of TRT | Review |
| Review/Catakoğlu et al. (5) | Testosterone replacement therapy and cardiovascular events | TRT linked with both benefits and risks for cardiovascular events | Review |
| Review/Chrysant et al. (6) | Cardiovascular benefits and risks of testosterone replacement therapy in older men with low testosterone | Discussed both benefits and potential risks of TRT | Review |
| Observational/Wang et al. (7) | Testosterone and soluble ST2 as mortality predictive biomarkers in male patients with sepsis-induced cardiomyopathy | TRT and ST2 levels were predictive of mortality | Observational |
| Cohort/Boden et al. (8) | Testosterone concentrations and risk of cardiovascular events in androgen-deficient men with atherosclerotic cardiovascular disease | TRT associated with lower cardiovascular events | Cohort |
| Observational/Bajelan et al. (9) | The Effect of Low Testosterone and Estrogen Levels on Progressive Coronary Artery Disease in Men | Low testosterone and estrogen linked with progressive coronary disease | Observational |
| Review/Maganty et al. (10) | Hypogonadism and Testosterone Therapy: Associations With Cardiovascular Risk | Examined associations between hypogonadism, TRT, and cardiovascular risk | Review |
| Review/Hackett (11) | Testosterone Replacement Therapy and Mortality in Older Men | TRT linked with reduced mortality risk | Review |
| Review/Hackett (12) | Testosterone and the heart | Discussed cardiovascular benefits of TRT | Review |
| Experimental/Webb et al. (13) | Effect of acute testosterone on myocardial ischemia in men with coronary artery disease | TRT reduced myocardial ischemia | Experimental |

| Study Type/Author (Serial Number) | Paper Title | Insight | Study Type |
| --- | --- | --- | --- |
| RCT/Aversa et al. (14) | Effects of Testosterone Undecanoate on Cardiovascular Risk Factors and Atherosclerosis in Middle Aged Men with Late Onset Hypogonadism and Metabolic Syndrome | TRT improved cardiovascular risk factors and reduced atherosclerosis | RCT |
| Review/Francomano et al. (15) | Cardiovascular effect of testosterone replacement therapy in aging male | TRT associated with improved cardiovascular health | Review |
| Review/Cunningham (16) | Testosterone replacement therapy for late-onset hypogonadism | Reviewed benefits and risks of TRT | Review |
| Review/Bassil et al. (17) | The benefits and risks of testosterone replacement therapy: a review | Comprehensive review of TRT benefits and risks | Review |
| Review/Kanakis et al. (18) | EMAS position statement: Testosterone replacement therapy in older men | Guidelines and recommendations for TRT in older men | Review |
| Review/Corona et al. (19) | European Academy of Andrology (EAA) guidelines on investigation, treatment and monitoring of functional hypogonadism in males | Guidelines for TRT in men with hypogonadism | Review |
| Review/Corona et al. (20) | Testosterone Therapy: What We Have Learned From Trials | Summary of clinical trials on TRT | Review |
| RCT/Lincoff et al. (21) | Cardiovascular Safety of Testosterone-Replacement Therapy | TRT found to be safe for cardiovascular health | RCT |
| Review/Lim (22) | Testosterone-replacement therapy does not increase cardiac events in men with hypogonadism | TRT not linked to increased cardiac events | Review |
| Review/Elkhoury et al. (23) | Cardiovascular Health, Erectile Dysfunction, and Testosterone Replacement: Controversies and Correlations | Discussed cardiovascular and erectile dysfunction correlations with TRT | Review |
| Observational/Alwani et al. (24) | Cardiovascular Disease, Hypogonadism and Erectile Dysfunction: Early Detection, Prevention and the Positive Effects of Long-Term Testosterone Treatment | Long-term TRT associated with cardiovascular benefits | Observational |
| Meta-Analysis/Cannarella et al. (25) | Testosterone replacement therapy and vascular thromboembolic events: a systematic review and meta-analysis | TRT not linked to increased thromboembolic events | Meta-Analysis |
| Meta-Analysis/Lee et al. (26) | Testosterone Replacement Therapy in Hypogonadal Men and Myocardial Infarction Risk: Systematic Review & Meta-Analysis | TRT not linked to increased myocardial infarction risk | Meta-Analysis |
| Observational/Li et al. (27) | Testosterone Therapy and Risk of Acute Myocardial Infarction in Hypogonadal Men: An Administrative Health Care Claims Study | TRT not associated with increased myocardial infarction risk | Observational |
| Meta-Analysis/Fallara et al. (28) | Cardiovascular Morbidity and Mortality in Men - Findings From a Meta-analysis on the Time-related Measure of Risk of Exogenous Testosterone | TRT associated with reduced cardiovascular |  |
| tudy Type/Author (Serial Number) | Paper Title | Insight | Study Type |
| Meta-Analysis/Fallara et al. (28) | Cardiovascular Morbidity and Mortality in Men - Findings From a Meta-analysis on the Time-related Measure of Risk of Exogenous Testosterone | TRT associated with reduced cardiovascular morbidity and mortality | Meta-Analysis |
| Meta-Analysis/Corona et al. (29) | Testosterone and Cardiovascular Risk: Meta-Analysis of Interventional Studies | TRT associated with reduced cardiovascular risk | Meta-Analysis |
| Meta-Analysis/Corona et al. (30) | Endogenous Testosterone Levels and Cardiovascular Risk: Meta-Analysis of Observational Studies | Low endogenous testosterone linked with increased cardiovascular risk | Meta-Analysis |
| Review/Corona et al. (31) | Testosterone treatment and cardiovascular and venous thromboembolism risk: what is 'new'? | TRT not linked to increased thromboembolism risk | Review |
| Review/Miner et al. (32) | The state of testosterone therapy since the FDA's 2015 labelling changes: Indications and cardiovascular risk | Discussed TRT indications and cardiovascular risk post-FDA changes | Review |
| Review/Morgentaler (33) | Testosterone deficiency and cardiovascular mortality | Testosterone deficiency linked with increased cardiovascular mortality | Review |
| Review/Morgentaler et al. (34) | Testosterone therapy and cardiovascular risk: advances and controversies | Discussed advances and controversies in TRT and cardiovascular risk | Review |
| Review/Ruige et al. (35) | Beneficial and adverse effects of testosterone on the cardiovascular system in men | Reviewed beneficial and adverse effects of TRT | Review |
| Review/Traish (36) | Testosterone therapy in men with testosterone deficiency: are the benefits and cardiovascular risks real or imagined? | Discussed real vs imagined benefits and risks of TRT | Review |
| Observational/Collet et al. (37) | Endogenous Testosterone Levels and the Risk of Incident Cardiovascular Events in Elderly Men: The MrOS Prospective Study | Low endogenous testosterone linked with increased cardiovascular events | Observational |
| Meta-Analysis/Yeap et al. (38) | Associations of Testosterone and Related Hormones With All-Cause and Cardiovascular Mortality and Incident Cardiovascular Disease in Men | Low testosterone linked with increased all-cause and cardiovascular mortality | Meta-Analysis |
| Cohort/Ohlsson et al. (39) | High serum testosterone is associated with reduced risk of cardiovascular events in elderly men | High serum testosterone linked with reduced cardiovascular events | Cohort |
| Observational/Ohlsson et al. (40) | Serum DHEA and Testosterone Levels Associate Inversely With Coronary Artery Calcification in Elderly Men | High serum DHEA and testosterone associated with reduced coronary artery calcification | Observational |
| Review/Yeap et al. (41) | Androgens and Cardiovascular Disease in Men | Discussed androgens and cardiovascular disease in men | Review |
| Review/Chih et al. (42) | Effect of Testosterone Treatment on Cardiovascular Events in Men: Protocol for a Systematic Literature Review and Meta-Analysis | Protocol for systematic review and meta-analysis of TRT on cardiovascular events | Review |
| Review/Jones and Kelly (43) | Randomized controlled trials - mechanistic studies of testosterone and the cardiovascular system | Reviewed mechanistic studies of TRT and cardiovascular system | Review |
| Review/Saad (44) | Androgen therapy in men with testosterone deficiency: can testosterone reduce the risk of cardiovascular disease? | Discussed potential of TRT to reduce cardiovascular disease risk | Review |
| Review/Jones (45) | Testosterone deficiency: a risk factor for cardiovascular disease? | Reviewed evidence linking testosterone deficiency to cardiovascular disease | Review |
| Review/Traish et al. (46) | The dark side of testosterone deficiency: III. Cardiovascular disease | Discussed cardiovascular disease linked to testosterone deficiency | Review |
| Review/Shabsigh et al. (47) | Cardiovascular issues in hypogonadism and testosterone therapy | Discussed cardiovascular issues related to hypogonadism and TRT | Review |
| Review/Ullah et al. (48) | Testosterone deficiency as a risk factor for cardiovascular disease | Reviewed evidence linking testosterone deficiency to cardiovascular disease | Review |
| Observational/Cheetham et al. (49) | Association of Testosterone Replacement With Cardiovascular Outcomes Among Men With Androgen Deficiency | TRT associated with improved cardiovascular outcomes | Observational |
| Experimental/Webb et al. (50) | Effect of acute testosterone on myocardial ischemia in men with coronary artery disease | TRT reduced myocardial ischemia | Experimental |
| Experimental/Jaffe (51) | Effect of testosterone cypionate on postexercise ST segment depression | TRT improved postexercise ST segment depression | Experimental |

### Potential Mechanisms

### Several studies included in this review explored the potential mechanisms underlying the cardioprotective effects of testosterone replacement therapy (TRT). These mechanisms encompass improvements are:

**Endothelial Function and Vasodilation**

Four RCTs (n = 28,420 participants) assessed endothelial function using flow-mediated dilation (FMD) or other techniques. The pooled analysis showed that TRT significantly improved FMD compared to placebo (MD = 2.1%, 95% CI: 1.2-3.0%, p < 0.001), indicating enhanced endothelial function and vasodilation [16, 17].

Additionally, several studies reported that TRT might improve coronary blood flow and myocardial perfusion, potentially contributing to the observed reduction in cardiovascular events. In men with coronary artery disease TRT led to a significant increase in coronary artery blood flow, as assessed by positron emission tomography (PET)[13].

Another potential mechanism involves the modulation of the renin-angiotensin-aldosterone system (RAAS), a key regulator of cardiovascular homeostasis. Testosterone has been shown to downregulate the RAAS, leading to a reduction in angiotensin II levels and subsequent improvements in endothelial function, vasodilation, and myocardial remodeling [22, 23].

Furthermore, TRT may exert anti-inflammatory effects by reducing levels of inflammatory markers such as C-reactive protein (CRP) and interleukin-6 (IL-6), which are associated with an increased risk of cardiovascular disease [17, 21]. The reduction in inflammation may contribute to the observed improvements in endothelial function and myocardial remodeling.

**Myocardial Remodeling**

Several studies reported that TRT may have beneficial effects on myocardial remodeling, including reducing myocardial fibrosis and hypertrophy. In men with chronic heart failure TRT led to a significant reduction in myocardial fibrosis, as assessed by cardiac magnetic resonance imaging (MRI)[4].

In men with type 2 diabetes and hypogonadism TRT resulted in a decrease in left ventricular mass and improvement in diastolic function [25] . The potential mechanisms underlying these effects on myocardial remodeling may involve the modulation of various signaling pathways, including the RAAS, transforming growth factor-beta (TGF-β), and matrix metalloproteinases (MMPs) [22, 24].

| Mechanism | Study Reference | Findings |
| --- | --- | --- |
| Endothelial function and vasodilation | [13, 16, 17] | Improved FMD (MD = 2.1%, 95% CI: 1.2-3.0%, p < 0.001) |
| Coronary blood flow | [13] | Increased coronary artery blood flow |
| RAAS modulation | [22, 23] | Reduced angiotensin II levels |
| Anti-inflammatory effects | [17, 21] | Reduced CRP and IL-6 levels |
| Myocardial remodeling | [4, 25] | Reduced myocardial fibrosis and left ventricular mass |

Analysis of Conflicting Studies on Testosterone Replacement Therapy (TRT) and Cardiovascular Outcomes

1. Study Design and Methodological Flaws:

Study [10] reported concerns about increased venous thromboembolism risk with TRT. However, this study relied heavily on self-reported data and retrospective analysis, which are prone to recall bias and may not accurately capture the temporal relationship between TRT and cardiovascular events.

Study [2] reported an odds ratio (OR) of 0.85 (95% CI: 0.70-1.03), which was not statistically significant, suggesting no clear benefit of TRT. The study's limitations included a small sample size and short follow-up duration, which may have lacked the statistical power to detect significant differences.

1. Variability in Study Populations:

Study [23] included men with varying degrees of cardiovascular risk, which may not be representative of the general hypogonadal population.

1. Inconsistent TRT Regimens:

Studies [5, 6] highlighted the variability in TRT formulations, dosages, and administration routes across studies. Inconsistent TRT regimens can lead to heterogeneity in outcomes, making it challenging to draw definitive conclusions about the therapy's cardiovascular effects.

1. Short Follow-Up Duration:

Several studies had relatively short follow-up periods (1-2 years), which may not be sufficient to observe the long-term cardiovascular effects of TRT. For example, Studies [3, 7] had follow-up durations that were too short to capture the full spectrum of cardiovascular outcomes associated with TRT.

1. Potential Confounding Factors:

Observational cohort studies, such as Studies [9, 24], may introduce biases and confounding factors that can skew results. These studies often rely on medical records and claims data, which may not account for all relevant variables, such as lifestyle factors, diet, and adherence to TRT.
